# Supplementary material
Source: PubMed Central journal article supplement (PMC5587860)
Supplement: 10.1074_M117.068015_mcp.M117.068015-1.pdf [file 10.1074_M117.068015_mcp.M117.068015-1.pdf]

**Table S1.** Primers used for quantitative real-time PCR

| Primer description | Primer sequences 5' - 3' |
|--------------------|--------------------------|
| qEF1- $\alpha$ fw  | TGAGCACGCTCTTCTTGCTTTCA  |
| qEF1- $\alpha$ rev | GGTGGTGGCATCCATCTTGTTACA |
| qPCR_TUB4_for      | GCGGTCAATGTGGAAACCAG     |
| qPCR_TUB4_rev      | TTCCACCGCTAGCTTCGTT      |
| qPCR_TSN1_for      | AGAGCAAGTGC GTGATGGAA    |
| qPCR_TSN1_rev      | TTGTGGTTCGCCTTCCCATT     |
| qPCR_TSN2_for      | TTCGGCTCAGTGTTCCCTTCC    |
| qPCR_TSN2_rev      | ACGATGTCTGAACCACAGTCC    |
| qPCR_PCAP1_for     | TCAAGCAGGCTTTGGTGAGA     |
| qPCR_PCAP1_rev     | CTCCGAAGCTAGACGAAGCC     |
| qPCR_PRF1_for      | TCGAAGGCAACCATCTCACC     |
| qPCR_PRF1_rev      | CGGGCTCCTCAAAGTCCTTC     |
| qPCR_ADF3_for      | AACCCATGAGGACCTTGCTG     |
| qPCR_ADF3_rev      | AGTTCTCTTCTTGCTGTGTCCG   |
| qPCR_ACT7_for      | CCATCGCTCATCGGAATGGA     |
| qPCR_ACT7_rev      | TGGAACCACCACTGAGAACG     |
| qPCR_VAB1_for      | GAAGAGTGCTATCGGCGAGG     |
| qPCR_VAB1_rev      | CCAACAACAGCTTTCATCGCT    |
| qPCR_PATL2_for     | TCGTTCCAGTAGAAACCACACC   |
| qPCR_PATL2_rev     | AGGCGGTTGCTTTCTCTTCTTT   |
| qPCR_WPP2_for      | AGCAGCCTCAA AAGACACAGA   |
| qPCR_WPP2_rev      | GGTCTCGATCAGGCGATTCA     |
| qPCR_ANNAT1_for    | GCACAAGGACATCAACGCAG     |
| qPCR_ANNAT1_rev    | AAGTCACCGGTAGTGTGGTG     |

**Table S2.** Quantification details of proteins identified in roots of *Arabidopsis fra2* and *ktn1-2* mutant seedlings. Proteins with significantly changed abundance in the mutants compared to wild type (Col-0) are highlighted in green. n.e.v. = not enough values; n.a. = not applicable

| Accession   | Description                                                           | Coverage Average | # Peptides Average | Score Average | intensity average Col-0 | intensity average <i>fra2</i> | intensity average <i>ktn1-2</i> | Fold change          |                        | P value              |                        |
|-------------|-----------------------------------------------------------------------|------------------|--------------------|---------------|-------------------------|-------------------------------|---------------------------------|----------------------|------------------------|----------------------|------------------------|
|             |                                                                       |                  |                    |               |                         |                               |                                 | <i>fra2</i> vs Col-0 | <i>ktn1-2</i> vs Col-0 | <i>fra2</i> vs Col-0 | <i>ktn1-2</i> vs Col-0 |
| gi15241472  | tubulin beta-4 chain                                                  | 11.49            | 8                  | 71.49         | 240128.62               | 47077.51                      | 186521.94                       | 0.20                 | 0.78                   | 0.01                 | 0.69                   |
| gi22326646  | TUDOR-SN protein 1                                                    | 6.26             | 5                  | 82.27         | 95564.72                | 143115.98                     | n.e.v.                          | 1.50                 | n.e.v.                 | 0.03                 | n.e.v.                 |
| gi15240352  | TUDOR-SN protein 2                                                    | 2.84             | 3                  | 65.71         | 38936.46                | 174370.46                     | 121379.87                       | 4.48                 | 3.12                   | 0.02                 | 0.26                   |
| gi79325183  | plasma-membrane associated cation-binding protein 1 (MDP25)           | 22.22            | 12                 | 88            | 215393.92               | 347248.10                     | 494622.54                       | 1.61                 | 2.30                   | 0.01                 | 0.15                   |
| gi15224838  | profilin 1                                                            | 43.51            | 11                 | 57.82         | 322859.36               | 351118.86                     | 476648.98                       | 1.09                 | 1.50                   | 0.79                 | 0.02                   |
| gi15219901  | patellin 2                                                            | 4.98             | 4                  | 62.71         | 313719.17               | n.e.v.                        | 69599.32                        | n.e.v.               | 0.22                   | n.e.v.               | 0.05                   |
| gi15221692  | pyruvate dehydrogenase E1 component subunit alpha-2                   | 17.56            | 11                 | 57.29         | 253127.82               | 55389.52                      | 66337.07                        | 0.22                 | 0.26                   | 0.01                 | 0.02                   |
| gi334187077 | aspartate aminotransferase                                            | 9.15             | 6                  | 82.13         | 121708.75               | 32934.98                      | 116714.08                       | 0.27                 | 0.96                   | 0.03                 | 0.91                   |
| gi30678219  | aconitate hydratase 3                                                 | 13.23            | 18                 | 166.58        | 323778.47               | 109380.02                     | n.e.v.                          | 0.34                 | n.e.v.                 | 0.01                 | n.e.v.                 |
| gi334185828 | Clp ATPase                                                            | 3.26             | 2                  | 35.74         | 107823.61               | 37454.35                      | 48712.02                        | 0.35                 | 0.45                   | 0.02                 | 0.03                   |
| gi79324564  | 40S ribosomal protein S5-1                                            | 13.53            | 7                  | 47.38         | 219962.29               | 82575.80                      | 94830.59                        | 0.38                 | 0.43                   | 0.01                 | 0.01                   |
| gi15225353  | Succinyl-CoA ligase [GDP-forming] subunit beta                        | 18.53            | 10                 | 80.15         | 263495.39               | 111292.66                     | 174312.91                       | 0.42                 | 0.66                   | 0.03                 | 0.08                   |
| gi15239146  | NADP-dependent malic enzyme 2                                         | 30.44            | 38                 | 187.86        | 1003320.78              | 441619.72                     | 935877.16                       | 0.44                 | 0.93                   | 0.00                 | 0.69                   |
| gi186509731 | methionine synthase 2                                                 | 18.56            | 33                 | 207.59        | 962657.34               | 434796.09                     | 939037.61                       | 0.45                 | 0.98                   | 0.02                 | 0.92                   |
| gi18404748  | GDSL esterase/lipase                                                  | 13.99            | 5                  | 65.13         | 267720.15               | 121028.16                     | 158559.70                       | 0.45                 | 0.59                   | 0.03                 | 0.18                   |
| gi18401618  | WPP domain-containing protein 2                                       | 12.22            | 1                  | 12.05         | 57976.36                | 26540.86                      | n.e.v.                          | 0.46                 | n.e.v.                 | 0.04                 | n.e.v.                 |
| gi15228895  | 40S ribosomal protein S26-3                                           | 11.54            | 6                  | 27.3          | 240410.89               | 116984.90                     | 329962.43                       | 0.49                 | 1.37                   | 0.00                 | 0.11                   |
| gi145334507 | 5-methyltetrahydropteroyltriglutamate--homocysteine methyltransferase | 24.18            | 57                 | 347.83        | 1667078.84              | 815465.26                     | 1473279.95                      | 0.49                 | 0.88                   | 0.01                 | 0.45                   |
| gi334187695 | voltage dependent anion channel 3                                     | 21.17            | 11                 | 67.7          | 317107.17               | 168096.32                     | 164290.15                       | 0.53                 | 0.52                   | 0.03                 | 0.20                   |
| gi79313261  | PYK10-binding protein 1                                               | 39.26            | 25                 | 148.67        | 1166764.61              | 630062.78                     | 644475.44                       | 0.54                 | 0.55                   | 0.01                 | 0.01                   |
| gi79313263  | jacalin-related lectin                                                | 12.67            | 5                  | 57.36         | 197278.44               | 124270.53                     | 170624.66                       | 0.63                 | 0.86                   | 0.03                 | 0.28                   |
| gi334187577 | 40S ribosomal protein S6-2                                            | 16.24            | 8                  | 43.67         | 228169.71               | 149712.38                     | 239319.90                       | 0.66                 | 1.05                   | 0.04                 | 0.75                   |
| gi15218740  | aspartyl protease-like protein                                        | 12.7             | 10                 | 69.22         | 345642.04               | 227866.91                     | 389789.99                       | 0.66                 | 1.13                   | 0.05                 | 0.59                   |
| gi30681554  | mitochondrial F1F0-ATP synthase subunit                               | 23.18            | 14                 | 101.49        | 274230.25               | 181283.09                     | 221030.28                       | 0.66                 | 0.81                   | 0.04                 | 0.20                   |

| Fad         |                                                             |       |    |        |            |            |            |      |        |      |        |
|-------------|-------------------------------------------------------------|-------|----|--------|------------|------------|------------|------|--------|------|--------|
| gi15238217  | sulfite reductase                                           | 9.03  | 7  | 48.75  | 162345.48  | 108951.42  | 70398.53   | 0.66 | 0.43   | 0.15 | 0.00   |
| gi15225120  | Stress responsive alpha-beta barrel domain protein          | 6.46  | 4  | 17.72  | 238471.81  | 166266.40  | 196401.63  | 0.66 | 0.82   | 0.05 | 0.15   |
| gi15235213  | putative caffeoyl-CoA O-methyltransferase                   | 34.36 | 12 | 83.45  | 297355.15  | 210995.81  | 59388.23   | 0.71 | 0.20   | 0.07 | 0.01   |
| gi15237069  | phosphoserine aminotransferase                              | 17.67 | 11 | 69.68  | 396111.97  | 356296.83  | 263792.36  | 0.90 | 0.67   | 0.33 | 0.03   |
| gi79313265  | JA-responsive protein 1                                     | 29.27 | 15 | 116.9  | 439830.08  | 465524.20  | 780848.43  | 1.06 | 1.78   | 0.32 | 0.05   |
| gi18379240  | MLP-like protein 328                                        | 23.84 | 9  | 86.32  | 237937.93  | 251919.29  | 486694.26  | 1.06 | 2.05   | 0.79 | 0.01   |
| gi15234263  | osmotin-like protein OSM34                                  | 6.56  | 1  | 19.56  | 195744.35  | 210699.81  | 585130.95  | 1.08 | 2.99   | 0.85 | 0.05   |
| gi15219200  | curculin-like (mannose-binding) lectin family protein       | 19.05 | 11 | 84.07  | 291204.27  | 325774.36  | 561134.27  | 1.12 | 1.93   | 0.73 | 0.01   |
| gi15227259  | cyclophilin ROC3                                            | 47.4  | 15 | 108.15 | 888249.94  | 1028777.50 | 382179.25  | 1.16 | 0.43   | 0.56 | 0.03   |
| gi30695409  | acetoacetyl-CoA thiolase 2                                  | 11.06 | 6  | 45.72  | 164420.32  | 196171.01  | 62697.70   | 1.19 | 0.38   | 0.66 | 0.02   |
| gi18406229  | TRAF-like protein                                           | 10.86 | 10 | 47.33  | 314828.44  | 376025.56  | 456418.28  | 1.19 | 1.50   | 0.31 | 0.02   |
| gi15231137  | endoribonuclease L-PSP family protein                       | 25.13 | 10 | 82.93  | 204849.00  | 265371.55  | 78599.01   | 1.30 | 0.38   | 0.09 | 0.01   |
| gi15229559  | heat shock protein 60                                       | 13.86 | 18 | 155.8  | 398046.67  | 531190.64  | 601597.63  | 1.33 | 1.51   | 0.41 | 0.01   |
| gi15228498  | UDP-GLUCOSE PYROPHOSPHORYLASE 1                             | 20.26 | 15 | 107.67 | 429397.39  | 614619.63  | 506492.94  | 1.50 | 1.18   | 0.01 | 0.24   |
| gi15235282  | D-3-phosphoglycerate dehydrogenase                          | 19.73 | 18 | 119.46 | 490117.51  | 721429.62  | 425614.23  | 1.50 | 0.87   | 0.03 | 0.28   |
| gi15242451  | AIG2-like protein                                           | 13.37 | 3  | 21.23  | 49929.87   | 74003.83   | 135910.94  | 1.50 | 2.72   | 0.24 | 0.05   |
| gi15233272  | triosephosphate isomerase                                   | 48.43 | 39 | 217.85 | 1888300.02 | 2821310.28 | 2256180.12 | 1.50 | 1.19   | 0.01 | 0.31   |
| gi15239019  | FK506- and rapamycin-binding protein 15-2                   | 23.93 | 6  | 33.42  | 136788.89  | 205017.27  | 229492.03  | 1.50 | 1.68   | 0.03 | 0.16   |
| gi15241849  | heat shock cognate protein 70-1                             | 32.57 | 58 | 351.8  | 2335111.93 | 3539564.81 | 3074931.18 | 1.52 | 1.32   | 0.02 | 0.07   |
| gi15230382  | cinnamyl alcohol dehydrogenase 4                            | 13.15 | 7  | 61.29  | 182824.12  | 280063.58  | 47992.34   | 1.53 | 0.26   | 0.46 | 0.05   |
| gi15242753  | adenylate kinase 1                                          | 11.79 | 6  | 44.34  | 171132.55  | 264137.25  | 211883.01  | 1.54 | 1.24   | 0.02 | 0.17   |
| gi15234648  | peroxidase 45                                               | 35.69 | 17 | 103.39 | 447213.47  | 690524.52  | 951861.94  | 1.54 | 2.13   | 0.05 | 0.02   |
| gi15221798  | 60S ribosomal protein L6-1                                  | 5.15  | 3  | 25.18  | 123564.32  | 196333.48  | 383764.34  | 1.59 | 3.11   | 0.00 | 0.01   |
| gi15221913  | high mobility group A5                                      | 6.05  | 3  | 18.16  | 44255.56   | 70349.10   | n.e.v.     | 1.59 | n.e.v. | 0.01 | n.e.v. |
| gi15240288  | glutamine synthetase 1;1                                    | 25    | 13 | 81.3   | 298680.74  | 482880.39  | 697291.84  | 1.62 | 2.33   | 0.21 | 0.00   |
| gi15241316  | 40S ribosomal protein S8-1                                  | 33.78 | 23 | 119.99 | 577782.54  | 945834.49  | 1084878.94 | 1.64 | 1.88   | 0.01 | 0.05   |
| gi15242459  | mitochondrial HSO70 2                                       | 6.74  | 10 | 121.78 | 229554.60  | 382186.76  | 289759.50  | 1.66 | 1.26   | 0.01 | 0.43   |
| gi18413214  | nucleoside diphosphate kinase 1                             | 14.79 | 6  | 37.37  | 226388.99  | 380425.14  | 393491.58  | 1.68 | 1.74   | 0.02 | 0.39   |
| gi145324909 | putative mitochondrial-processing peptidase subunit alpha-1 | 8.87  | 4  | 60.09  | 242648.10  | 410943.54  | 372890.28  | 1.69 | 1.54   | 0.01 | 0.68   |

|             |                                                               |       |    |        |           |            |            |      |        |      |        |
|-------------|---------------------------------------------------------------|-------|----|--------|-----------|------------|------------|------|--------|------|--------|
| gi42572347  | adenosine kinase 1                                            | 32.45 | 26 | 188.85 | 800267.16 | 1372076.81 | n.e.v.     | 1.71 | n.e.v. | 0.04 | n.e.v. |
| gi15230922  | dihydrolipoamide S-acetyltransferase                          | 9.79  | 11 | 49.86  | 180992.18 | 316567.24  | 392827.01  | 1.75 | 2.17   | 0.09 | 0.05   |
| gi15229033  | S-adenosylmethionine synthase 4                               | 16.79 | 10 | 76.2   | 420397.84 | 747635.70  | 183269.66  | 1.78 | 0.44   | 0.00 | 0.05   |
| gi18391066  | 2,3-bisphosphoglycerate-independent phosphoglycerate mutase 1 | 6.46  | 9  | 119.98 | 277089.35 | 494797.65  | 399212.91  | 1.79 | 1.44   | 0.02 | 0.16   |
| gi145334765 | 60S acidic ribosomal protein P1-3                             | 49.56 | 8  | 38.75  | 161868.97 | 289181.64  | 168375.04  | 1.79 | 1.04   | 0.03 | 0.32   |
| gi18407594  | vacuolar calcium-binding protein-like protein                 | 18.42 | 4  | 22.5   | 103165.04 | 187351.14  | 201343.38  | 1.82 | 1.95   | 0.29 | 0.04   |
| gi15224648  | membrane-associated progesterone binding protein 2            | 30    | 5  | 43.83  | 203330.29 | 371469.14  | 439583.49  | 1.83 | 2.16   | 0.03 | 0.02   |
| gi15227443  | 40S ribosomal protein S2-3                                    | 10.53 | 8  | 33.78  | 136552.55 | 250379.15  | 111717.93  | 1.83 | 0.82   | 0.05 | 0.36   |
| gi145334587 | glutamine synthetase                                          | 5.12  | 3  | 30.66  | 46791.31  | 88530.95   | 106136.58  | 1.89 | 2.27   | 0.01 | 0.09   |
| gi18415982  | tetratricopeptide repeat protein                              | 15.42 | 14 | 80.39  | 222702.14 | 427357.63  | 486498.43  | 1.92 | 2.18   | 0.03 | 0.02   |
| gi18399100  | 40S ribosomal protein S18                                     | 13.16 | 6  | 46.7   | 113741.22 | 227944.46  | 394848.67  | 2.00 | 3.47   | 0.00 | 0.00   |
| gi18411901  | 14-3-3-like protein GF14 omega                                | 16.99 | 15 | 112.66 | 296525.00 | 596614.35  | 490908.54  | 2.01 | 1.66   | 0.10 | 0.05   |
| gi30683366  | calmodulin 5                                                  | 29.2  | 8  | 49.72  | 534139.91 | 1135953.50 | 162121.80  | 2.13 | 0.30   | 0.05 | 0.11   |
| gi186513977 | aconitase 2                                                   | 5.53  | 3  | 83.56  | 53681.62  | 117622.48  | 57680.04   | 2.19 | 1.07   | 0.03 | 0.81   |
| gi15229529  | putative dihydropyrimidine dehydrogenase                      | 15.49 | 6  | 36.61  | 75887.92  | 179154.41  | 189102.54  | 2.36 | 2.49   | 0.05 | 0.26   |
| gi15235401  | glutathione S-transferase F2                                  | 22.17 | 12 | 83.3   | 644121.71 | 1578139.78 | 2106336.43 | 2.45 | 3.27   | 0.00 | 0.01   |
| gi145329204 | triosephosphate isomerase                                     | 13.07 | 6  | 43.94  | 148158.00 | 366354.23  | 305748.27  | 2.47 | 2.06   | 0.00 | 0.00   |
| gi15226755  | 60S ribosomal protein L18a-2                                  | 10.11 | 1  | 14.24  | 16044.61  | 40464.01   | 109596.73  | 2.52 | 6.83   | 0.01 | 0.09   |
| gi18401719  | succinate dehydrogenase 5                                     | 6.23  | 3  | 21.64  | 72328.48  | 183138.94  | 53708.23   | 2.53 | 0.74   | 0.01 | 0.53   |
| gi15224960  | uclacyanin 2                                                  | 5.94  | 1  | 36.84  | 22191.00  | 62684.20   | 44995.58   | 2.82 | 2.03   | 0.05 | 0.60   |
| gi15220770  | 1-aminocyclopropane-1-carboxylate oxidase 2                   | 5.31  | 3  | 18.34  | 67502.45  | 215775.65  | 75197.41   | 3.20 | 1.11   | 0.02 | 0.82   |
| gi145323888 | 60S ribosomal protein L10-1                                   | 7.36  | 3  | 13.03  | 68685.02  | 219605.46  | 45737.34   | 3.20 | 0.67   | 0.03 | 0.45   |
| gi15220930  | 26S proteasome AAA-ATPase subunit RPT1a                       | 6.1   | 3  | 28.29  | 77453.43  | 261863.02  | 261909.23  | 3.38 | 3.38   | 0.00 | 0.21   |
| gi15239772  | aspartate aminotransferase                                    | 5.19  | 1  | 21.24  | 29222.23  | 101792.69  | 103084.18  | 3.48 | 3.53   | 0.00 | 0.14   |
| gi15231536  | cytochrome P450 71B4                                          | 2.98  | 2  | 24.75  | 74432.31  | 264185.16  | 135042.09  | 3.55 | 1.81   | 0.02 | 0.13   |
| gi15233111  | cysteine synthase C1                                          | 3.26  | 3  | 23.97  | 52115.82  | 185447.46  | 136112.56  | 3.56 | 2.61   | 0.05 | 0.01   |
| gi15223910  | aspartate semialdehyde dehydrogenase                          | 10.4  | 4  | 49.17  | 55508.12  | 230059.47  | 125986.93  | 4.14 | 2.27   | 0.05 | 0.05   |
| gi30682601  | vacuolar calcium-binding protein-like protein                 | 18.84 | 1  | 10.37  | 57633.53  | 242968.33  | 103128.61  | 4.22 | 1.79   | 0.01 | 0.05   |
| gi18402225  | Granulin repeat cysteine protease family protein              | 12.39 | 5  | 30.53  | 75658.44  | 343248.11  | 448897.32  | 4.54 | 5.93   | 0.01 | 0.00   |

|             |                                                              |       |    |        |           |           |           |                |        |             |        |
|-------------|--------------------------------------------------------------|-------|----|--------|-----------|-----------|-----------|----------------|--------|-------------|--------|
| gi30678607  | 40S ribosomal protein S7-2                                   | 14.66 | 2  | 27.07  | 27700.14  | 127495.13 | n.e.v.    | 4.60           | n.e.v. | 0.02        | n.e.v. |
| gi15235002  | glycine-rich RNA-binding protein 8                           | 31.95 | 12 | 94.88  | 355850.01 | n.e.v.    | 670428.41 | n.e.v.         | 1.88   | n.e.v.      | 0.00   |
| gi15230358  | adenylosuccinate synthetase                                  | 7.35  | 3  | 21.96  | 61378.48  | 0         | 0         | unique in Col0 | n.a.   | n.a.        |        |
| gi15236014  | Lipase/lipoxygenase, PLAT/LH2 family protein                 | 9.94  | 2  | 22.5   | 38041.31  | 0         | 0         | unique in Col0 | n.a.   | n.a.        |        |
| gi18397991  | MD-2-related lipid recognition domain-containing protein     | 8.75  | 1  | 9.53   | 102011.46 | 0         | 0         | unique in Col0 | n.a.   | n.a.        |        |
| gi18413181  | 14-3-3-like protein GF14 chi                                 | 29.21 | 22 | 158.43 | 797937.21 | 0         | 0         | unique in Col0 | n.a.   | n.a.        |        |
| gi42570831  | S-alkyl-thiohydroximate lyase SUR1                           | 5.28  | 1  | 10.32  | 6362.74   | 0         | 0         | unique in Col0 | n.a.   | n.a.        |        |
| gi79313434  | gamma-hydroxybutyrate dehydrogenase                          | 8.63  | 1  | 28.24  | 14385.25  | 0         | 0         | unique in Col0 | n.a.   | n.a.        |        |
| gi15227825  | ankyrin repeat-containing 2B                                 | 8.72  | 3  | 28.73  | 60614.28  | 106301.7  | 68474.64  | 1.75           | 1.13   | 0.20        | 0.51   |
| gi334187059 | 20S proteasome subunit PBA1                                  | 5.15  | 1  | 17.04  | 123007.4  | 211269.2  | 186257.8  | 1.72           | 1.51   | 0.241144559 | 0.16   |
| gi30699430  | phosphoglycerate kinase                                      | 34.66 | 32 | 217.23 | 1071051   | 1426708   | 1117471   | 1.33           | 1.04   | 0.02        | 0.72   |
| gi334182565 | salt tolerance-related protein                               | 30.97 | 4  | 38.44  | 370103.4  | 246086.9  | 317337.1  | 0.66           | 0.86   | 0.44        | 0.55   |
| gi15224582  | glutathione S-transferase PHI 10                             | 12.56 | 7  | 66.12  | 265852.9  | 189714    | 204613.4  | 0.71           | 0.77   | 0.03        | 0.13   |
| gi18411929  | glutathione S-transferase TAU 19                             | 5.48  | 6  | 35.69  | 227662.9  | 125293.2  | 85204.78  | 0.55           | 0.37   | 0.40        | 0.16   |
| gi15233740  | HSP90-like protein GRP94                                     | 13.73 | 17 | 109.76 | 532936    | 686679.5  | 460754.2  | 1.29           | 0.86   | 0.51        | 0.75   |
| gi15236375  | serine hydroxymethyltransferase 4                            | 16.35 | 18 | 103.77 | 652113.1  | 1045704   | 983510.9  | 1.60           | 1.51   | 0.11        | 0.16   |
| gi15226314  | chaperonin-60 alpha                                          | 20.99 | 19 | 125.7  | 334610.8  | 455697.4  | 385873.6  | 1.36           | 1.15   | 0.32        | 0.54   |
| gi15236220  | putative elongation factor Tu                                | 24.45 | 9  | 61.29  | 383886.1  | 431545.9  | 416486.4  | 1.12           | 1.08   | 0.77        | 0.87   |
| gi15237303  | plastidial pyruvate kinase 2                                 | 6.04  | 2  | 39.58  | 35424.46  | 24692.28  | n.e.v.    | 0.70           | n.e.v. | 0.06        | n.e.v. |
| gi26557005  | ATPase subunit 1                                             | 19.72 | 23 | 208.15 | 821656    | 865850.3  | 505762.8  | 1.05           | 0.62   | 0.89        | 0.16   |
| gi30690396  | Peroxidase family protein                                    | 21.59 | 23 | 157.24 | 943373.3  | 670760    | 727175.2  | 0.71           | 0.77   | 0.06        | 0.28   |
| gi42572663  | Adenine nucleotide alpha hydrolases-like superfamily protein | 21.43 | 7  | 37.52  | 228025.2  | 132442.5  | 38634.42  | 0.58           | 0.17   | 0.15        | 0.08   |
| gi334186539 | O-acetylserine (thiol) lyase (OAS-TL) isoform A1             | 18.63 | 8  | 77.44  | 364273.3  | 169538.3  | 320063.4  | 0.47           | 0.88   | 0.06        | 0.59   |
| gi15228869  | copper chaperone                                             | 43.8  | 18 | 88.41  | 491435.1  | 1058727   | 832819.4  | 2.15           | 1.69   | 0.06        | 0.18   |
| gi79321468  | V-type proton ATPase catalytic subunit A                     | 25.68 | 28 | 184.93 | 922538.3  | 609994    | 1050542   | 0.66           | 1.14   | 0.06        | 0.44   |
| gi145323700 | 60S acidic ribosomal protein P1-1                            | 49.11 | 9  | 40.16  | 263484    | 524790.1  | 269684.6  | 1.99           | 1.02   | 0.06        | 0.95   |
| gi79607896  | jacalin-like lectin domain-containing protein                | 32.91 | 52 | 287.78 | 1672903   | 2084962   | 1937789   | 1.25           | 1.16   | 0.06        | 0.55   |
| gi15232626  | beta-glucosidase 23                                          | 31.87 | 34 | 316.73 | 1659867   | 511820.5  | 1076137   | 0.31           | 0.65   | 0.07        | 0.37   |
| gi30680156  | fructose-bisphosphate aldolase 4                             | 16.43 | 18 | 85.77  | 1525785   | 922811.3  | 1445175   | 0.60           | 0.95   | 0.07        | 0.73   |
| gi30683070  | tubulin alpha-6 chain                                        | 28.81 | 17 | 107.08 | 594989.8  | 312812.7  | 421923.1  | 0.53           | 0.71   | 0.07        | 0.30   |

|             |                                                                       |       |    |        |          |          |          |       |        |      |        |
|-------------|-----------------------------------------------------------------------|-------|----|--------|----------|----------|----------|-------|--------|------|--------|
| gi79329956  | beta-ketoacyl-[acyl carrier protein] synthase I                       | 11.96 | 7  | 36.83  | 176865.2 | 54172.24 | 166929.6 | 0.31  | 0.94   | 0.07 | 0.90   |
| gi15226212  | 60S ribosomal protein L7-2                                            | 6.2   | 1  | 16.54  | 52260.27 | 111169.4 | 52038.55 | 2.13  | 1.00   | 0.08 | 0.99   |
| gi79315306  | alpha-soluble NSF attachment protein 2                                | 5.42  | 1  | 18.14  | 34115.82 | 85732.52 | 123493.2 | 2.51  | 3.62   | 0.08 | 0.08   |
| gi15225232  | myrosinase-binding protein-like protein                               | 3.79  | 1  | 40.22  | 73486.83 | 35284.07 | 44856.13 | 0.48  | 0.61   | 0.08 | 0.22   |
| gi79315846  | proteasome subunit beta type-1                                        | 13.45 | 4  | 36.55  | 135330.6 | 239261.7 | 199524.7 | 1.77  | 1.47   | 0.08 | 0.38   |
| gi186502696 | aminopeptidase family protein                                         | 23.27 | 31 | 197.74 | 699849.6 | 588234.6 | 547988.6 | 0.84  | 0.78   | 0.09 | 0.05   |
| gi18379072  | aspartyl protease-like protein                                        | 9.45  | 4  | 41.6   | 132442.1 | 51730.51 | n.e.v.   | 0.39  | n.e.v. | 0.09 | n.e.v. |
| gi18423437  | probable NADH dehydrogenase [ubiquinone] 1 alpha subcomplex subunit 5 | 26.04 | 7  | 42.49  | 183652.7 | 301487   | 255523.9 | 1.64  | 1.39   | 0.09 | 0.25   |
| gi15229522  | adenosylhomocysteinase 2                                              | 18.14 | 14 | 128.1  | 323730.3 | 542894.2 | n.e.v.   | 1.68  | n.e.v. | 0.10 | n.e.v. |
| gi15220424  | methylesterase PCR A                                                  | 12.39 | 13 | 90.3   | 394656.1 | 962139.7 | 520390.6 | 2.44  | 1.32   | 0.10 | 0.65   |
| gi15241125  | 40S ribosomal protein S24-2                                           | 11.28 | 9  | 36.59  | 81865.11 | 142543.9 | 100467.1 | 1.74  | 1.23   | 0.10 | 0.21   |
| gi15241051  | 60S ribosomal protein L22-3                                           | 10.48 | 1  | 21.24  | 136593.8 | 364631   | 223416.9 | 2.67  | 1.64   | 0.10 | 0.34   |
| gi30685069  | actin 2                                                               | 15.63 | 14 | 108.61 | 82023.85 | 482384.7 | 144480   | 5.88  | 1.76   | 0.10 | 0.20   |
| gi334186158 | transketolase                                                         | 5.81  | 8  | 64.14  | 225482.9 | 367178.1 | 325339.5 | 1.63  | 1.44   | 0.10 | 0.30   |
| gi18414298  | monodehydroascorbate reductase (NADH)                                 | 29.66 | 17 | 113.76 | 519666.5 | 358611.6 | 331488.5 | 0.69  | 0.64   | 0.10 | 0.14   |
| gi15226906  | glycine decarboxylase complex protein H2                              | 24.36 | 5  | 29.82  | 105867.2 | 283194.6 | 166261.2 | 2.67  | 1.57   | 0.11 | 0.07   |
| gi15236606  | putative apoplactic peroxidase Prx37                                  | 19.94 | 7  | 69.72  | 76723.02 | 144336.8 | n.e.v.   | 1.88  | n.e.v. | 0.11 | n.e.v. |
| gi15221156  | pyrophosphate--fructose-6-phosphate 1-phosphotransferase              | 16.61 | 13 | 91.21  | 233085.5 | 529836.5 | 230435   | 2.27  | 0.99   | 0.11 | 0.98   |
| gi186510200 | transcription factor TCP18                                            | 2.8   | 1  | 25.86  | 2971.544 | 31959.05 | 23027.12 | 10.76 | 7.75   | 0.11 | 0.11   |
| gi30684428  | dihydrolipoyl dehydrogenase 2                                         | 13.02 | 9  | 78.08  | 83174.05 | 435584.4 | n.e.v.   | 5.24  | n.e.v. | 0.12 | n.e.v. |
| gi30687521  | protein disulfide isomerase-like 1-1                                  | 17.04 | 17 | 129.45 | 593145.6 | 890299.1 | 667233.6 | 1.50  | 1.12   | 0.12 | 0.37   |
| gi15233268  | 20S proteasome alpha-3 subunit                                        | 24.4  | 8  | 55.89  | 189118.6 | 300046.8 | 199879.4 | 1.59  | 1.06   | 0.12 | 0.85   |
| gi18395103  | 14-3-3-like protein GF14 epsilon                                      | 17.72 | 12 | 110.9  | 407906.9 | 229008.6 | 371855.2 | 0.56  | 0.91   | 0.13 | 0.67   |
| gi145328282 | Methylmalonate-semialdehyde dehydrogenase [acylating]                 | 6.22  | 1  | 17.26  | 27934.12 | 53320.42 | 42865.21 | 1.91  | 1.53   | 0.13 | 0.47   |
| gi79313181  | Superoxide dismutase [Mn]                                             | 6.52  | 3  | 15.36  | 134552.9 | 192707.6 | 193478   | 1.43  | 1.44   | 0.13 | 0.11   |
| gi30694819  | 60S ribosomal protein L11-2                                           | 8.14  | 1  | 26.89  | 35442.36 | 154771.9 | 24248.15 | 4.37  | 0.68   | 0.13 | 0.50   |
| gi15238030  | peroxidase 57                                                         | 4.47  | 3  | 26.56  | 136596.5 | 41044.43 | n.e.v.   | 0.30  | n.e.v. | 0.13 | n.e.v. |
| gi15242674  | glutaredoxin-C2                                                       | 34.23 | 8  | 41.69  | 212851.1 | 148184.5 | 244587.7 | 0.70  | 1.15   | 0.14 | 0.58   |
| gi15224669  | probable fructokinase-1                                               | 17.85 | 7  | 59.04  | 353801.4 | 617127.9 | 418762.7 | 1.74  | 1.18   | 0.14 | 0.75   |
| gi15238284  | CBS domain-containing protein                                         | 26.7  | 8  | 73.39  | 207136.4 | 309751.4 | 333288.1 | 1.50  | 1.61   | 0.14 | 0.21   |

|             |                                                     |       |    |        |          |          |          |      |        |      |        |
|-------------|-----------------------------------------------------|-------|----|--------|----------|----------|----------|------|--------|------|--------|
| gi15218869  | isocitrate dehydrogenase                            | 30.98 | 34 | 236.4  | 1189832  | 1741557  | 1004663  | 1.46 | 0.84   | 0.14 | 0.65   |
| gi15221019  | GDSL esterase/lipase                                | 42.46 | 26 | 176.55 | 1000005  | 565640.9 | 1074455  | 0.57 | 1.07   | 0.15 | 0.79   |
| gi15227376  | S-formylglutathione hydrolase                       | 4.58  | 2  | 17.57  | 56487.42 | 32323.48 | 56323.47 | 0.57 | 1.00   | 0.15 | 0.99   |
| gi30697327  | beta-glucosidase 21                                 | 6.13  | 9  | 134.82 | 331499.9 | 182980.3 | 226582.3 | 0.55 | 0.68   | 0.16 | 0.25   |
| gi79314806  | ATP synthase subunit d                              | 9.84  | 3  | 24.91  | 232170.3 | 386089.1 | 214557.7 | 1.66 | 0.92   | 0.16 | 0.84   |
| gi145332383 | translational initiation factor 4A-1                | 10.95 | 8  | 59.4   | 399775.2 | 1084615  | 312686.4 | 2.71 | 0.78   | 0.16 | 0.69   |
| gi15219721  | malate dehydrogenase                                | 35.84 | 33 | 278.82 | 1198445  | 597346.1 | 814478.6 | 0.50 | 0.68   | 0.16 | 0.28   |
| gi15220216  | annexin 1                                           | 19.24 | 10 | 112.36 | 594053.9 | 482464.8 | 399719.4 | 0.81 | 0.67   | 0.16 | 0.20   |
| gi15237488  | prohibitin 3                                        | 11.55 | 4  | 24.78  | 113197.3 | 155499.8 | 87873.02 | 1.37 | 0.78   | 0.16 | 0.68   |
| gi18404382  | malate dehydrogenase 1                              | 39.3  | 33 | 167.15 | 1015713  | 780770.1 | 923296.7 | 0.77 | 0.91   | 0.16 | 0.84   |
| gi186513287 | argininosuccinate synthase                          | 3.78  | 3  | 33.98  | 44407.28 | 155850.8 | 51412.36 | 3.51 | 1.16   | 0.17 | 0.75   |
| gi79557518  | NADPH-dependent thioredoxin reductase A             | 15.61 | 11 | 66.47  | 287342.6 | 183857.5 | n.e.v.   | 0.64 | n.e.v. | 0.17 | n.e.v. |
| gi18394249  | transducin/WD40 repeat-like superfamily protein     | 3.9   | 1  | 3.75   | 12181.55 | 110242.1 | 53317.78 | 9.05 | 4.38   | 0.17 | 0.12   |
| gi15232865  | reversibly glycosylated polypeptide 1               | 7.56  | 5  | 53.08  | 212790.2 | 81049.55 | n.e.v.   | 0.38 | n.e.v. | 0.17 | n.e.v. |
| gi145331433 | fumarate hydratase 1                                | 4.88  | 5  | 31.35  | 149029.1 | 249892.9 | 222139.1 | 1.68 | 1.49   | 0.17 | 0.40   |
| gi15241286  | pyruvate dehydrogenase E1 beta                      | 21.49 | 13 | 84.97  | 436970.5 | 522400.5 | 552052.9 | 1.20 | 1.26   | 0.19 | 0.05   |
| gi30691988  | chaperone protein dnaJ 3                            | 3.5   | 1  | 7.27   | 35153.51 | 74732.45 | 53895.21 | 2.13 | 1.53   | 0.19 | 0.23   |
| gi15227987  | bifunctional enolase 2/transcriptional activator    | 55.41 | 57 | 348.22 | 2065402  | 3408545  | 2036043  | 1.65 | 0.99   | 0.19 | 0.91   |
| gi42571329  | prohibitin 2                                        | 15.84 | 7  | 38.35  | 108785.6 | 170489.9 | n.e.v.   | 1.57 | n.e.v. | 0.19 | n.e.v. |
| gi15219413  | nascent polypeptide-associated complex subunit beta | 24.24 | 7  | 37.02  | 63927.13 | 118736.8 | n.e.v.   | 1.86 | n.e.v. | 0.19 | n.e.v. |
| gi30691626  | heat shock protein 70-1                             | 8.36  | 11 | 127.07 | 231959.5 | 356487   | 317863.8 | 1.54 | 1.37   | 0.20 | 0.35   |
| gi334186408 | L-ascorbate peroxidase S                            | 7.23  | 4  | 36.91  | 58671.7  | 114218.2 | 58162.26 | 1.95 | 0.99   | 0.21 | 0.95   |
| gi15234357  | tolB-related protein                                | 2.3   | 1  | 24.89  | 46619.94 | 91283.19 | n.e.v.   | 1.96 | n.e.v. | 0.21 | n.e.v. |
| gi15231255  | TCP-1/cpn60 chaperonin family protein               | 16.11 | 18 | 96.06  | 392465.4 | 494515.8 | 402418   | 1.26 | 1.03   | 0.22 | 0.90   |
| gi15233538  | profilin 2                                          | 29.01 | 8  | 46.09  | 224872.5 | 350126.8 | 288355.6 | 1.56 | 1.28   | 0.23 | 0.40   |
| gi15229095  | peroxidase 34                                       | 23.8  | 13 | 117.14 | 371096.3 | 496393.3 | 372518.7 | 1.34 | 1.00   | 0.23 | 0.98   |
| gi15241844  | Luminal-binding protein 1                           | 15.25 | 28 | 182.32 | 787075.7 | 589865.9 | n.e.v.   | 0.75 | n.e.v. | 0.23 | n.e.v. |
| gi15237278  | 40S ribosomal protein S7-3                          | 20    | 5  | 53.4   | 140769.5 | 204226.8 | 247043.4 | 1.45 | 1.75   | 0.25 | 0.07   |
| gi15222848  | glyceraldehyde 3-phosphate dehydrogenase            | 44.97 | 40 | 282.94 | 2871802  | 4791030  | 908515   | 1.67 | 0.32   | 0.25 | 0.16   |
| gi15218877  | thioredoxin-dependent peroxidase 1                  | 24.07 | 2  | 19.35  | 34522.62 | 77674.66 | n.e.v.   | 2.25 | n.e.v. | 0.25 | n.e.v. |
| gi18405982  | AIG2-like protein                                   | 13.61 | 1  | 17.88  | 115209   | 79376.46 | 110613.3 | 0.69 | 0.96   | 0.25 | 0.88   |

|             |                                                                      |       |    |        |          |          |          |      |        |      |        |
|-------------|----------------------------------------------------------------------|-------|----|--------|----------|----------|----------|------|--------|------|--------|
| gi15224221  | Aconitase/3-isopropylmalate dehydratase protein                      | 12.75 | 6  | 52.45  | 143631.2 | 168321.2 | n.e.v.   | 1.17 | n.e.v. | 0.26 | n.e.v. |
| gi18418498  | NADH-ubiquinone oxidoreductase complex 1B22                          | 17.09 | 2  | 7.41   | 208558.5 | 151687.6 | 223466.8 | 0.73 | 1.07   | 0.27 | 0.83   |
| gi30681492  | glycine-rich RNA-binding protein 7                                   | 28.93 | 18 | 88.98  | 815631.8 | 1274428  | 736228.7 | 1.56 | 0.90   | 0.28 | 0.80   |
| gi15237613  | peroxidase 69                                                        | 12.99 | 2  | 22.18  | 178051.3 | 311319   | 477299.3 | 1.75 | 2.68   | 0.29 | 0.10   |
| gi30697102  | Ran-binding protein 1                                                | 9.13  | 1  | 6.42   | 34335.47 | 157514.8 | n.e.v.   | 4.59 | n.e.v. | 0.30 | n.e.v. |
| gi15231705  | 60S ribosomal protein L38                                            | 17.39 | 1  | 8.35   | 28664.91 | 131144   | n.e.v.   | 4.58 | n.e.v. | 0.30 | n.e.v. |
| gi18397457  | peroxiredoxin-2F                                                     | 14.93 | 4  | 29.85  | 238292.1 | 273962.7 | 178243   | 1.15 | 0.75   | 0.31 | 0.24   |
| gi145329995 | glutathione S-transferase PHI 9                                      | 21.08 | 10 | 76.73  | 220587.4 | 123652.7 | 164151.7 | 0.56 | 0.74   | 0.31 | 0.55   |
| gi15241847  | heat shock protein 70                                                | 16.23 | 17 | 165.97 | 1232496  | 1704128  | n.e.v.   | 1.38 | n.e.v. | 0.32 | n.e.v. |
| gi15221141  | aspartic proteinase A1                                               | 24.31 | 15 | 95.99  | 250559.9 | 192369.6 | 175216.4 | 0.77 | 0.70   | 0.32 | 0.68   |
| gi15232215  | methylenetetrahydrofolate reductase 1                                | 5.91  | 3  | 37.43  | 114191   | 48802.48 | 46025.46 | 0.43 | 0.40   | 0.33 | 0.32   |
| gi334185265 | TCP-1/cpn60 chaperonin family protein                                | 7.93  | 4  | 35.74  | 132987.2 | 75716.54 | 44749.87 | 0.57 | 0.34   | 0.33 | 0.07   |
| gi15229806  | 2-Cys peroxiredoxin BAS1                                             | 6.39  | 2  | 13.54  | 28723.55 | 50748.03 | 50031.86 | 1.77 | 1.74   | 0.33 | 0.19   |
| gi15236211  | rotamase cyclophilin 5                                               | 40.7  | 13 | 129.46 | 707180   | 1142772  | 498407.8 | 1.62 | 0.70   | 0.34 | 0.47   |
| gi238478984 | homolog of anti-oxidant 1                                            | 21.21 | 1  | 21.82  | 107749.7 | 227350.8 | n.e.v.   | 2.11 | n.e.v. | 0.34 | n.e.v. |
| gi15218420  | UDP-L-rhamnose synthase                                              | 3.44  | 2  | 60.17  | 70868    | 106850   | n.e.v.   | 1.51 | n.e.v. | 0.34 | n.e.v. |
| gi15220874  | kunitz type trypsin and protease inhibitor domain-containing protein | 11.22 | 1  | 12.05  | 55033.99 | 237865.8 | 103154.3 | 4.32 | 1.87   | 0.34 | 0.29   |
| gi240254562 | uncharacterized protein                                              | 2.1   | 2  | 64.81  | 80571.09 | 128972.2 | 156163.7 | 1.60 | 1.94   | 0.34 | 0.44   |
| gi18411985  | NADH dehydrogenase (ubiquinone) flavoprotein 2                       | 11.37 | 5  | 33.19  | 45401.28 | 68203.36 | n.e.v.   | 1.50 | n.e.v. | 0.34 | n.e.v. |
| gi30684617  | 40S ribosomal protein S12-1                                          | 9.72  | 4  | 22.33  | 649675.8 | 420826.1 | 499174.4 | 0.65 | 0.77   | 0.35 | 0.52   |
| gi18394184  | chaperonin 10                                                        | 27.55 | 5  | 28.18  | 105365.3 | 173316.4 | 176061.5 | 1.64 | 1.67   | 0.35 | 0.14   |
| gi15230595  | phosphoglycerate kinase 1                                            | 24.95 | 14 | 95.96  | 316787.9 | 508526.5 | n.e.v.   | 1.61 | n.e.v. | 0.36 | n.e.v. |
| gi18410311  | kunitz trypsin inhibitor 1                                           | 6.51  | 1  | 10.24  | 34829.83 | 74958.64 | 95067.91 | 2.15 | 2.73   | 0.36 | 0.06   |
| gi15232981  | Isopentenyl-diphosphate Delta-isomerase II                           | 12.32 | 4  | 39.14  | 91241.37 | 117459.4 | n.e.v.   | 1.29 | n.e.v. | 0.37 | n.e.v. |
| gi30694420  | 40S ribosomal protein S7-1                                           | 19.37 | 5  | 32.93  | 43038.55 | 71669.22 | 43347.75 | 1.67 | 1.01   | 0.37 | 0.97   |
| gi79329200  | ribulose bisphosphate carboxylase small chain 3B                     | 8.05  | 5  | 33.31  | 109932.4 | 158305   | 158777.2 | 1.44 | 1.44   | 0.37 | 0.31   |
| gi15222338  | 60S ribosomal protein L35a-2                                         | 22.52 | 1  | 7.42   | 40265.84 | 68910.13 | n.e.v.   | 1.71 | n.e.v. | 0.37 | n.e.v. |
| gi30692256  | glycine-rich RNA-binding protein 8                                   | 42.39 | 7  | 52.11  | 183101   | 342973.4 | n.e.v.   | 1.87 | n.e.v. | 0.37 | n.e.v. |
| gi79313237  | protein DJ-1-like A                                                  | 26.02 | 13 | 88.48  | 492270.7 | 350595.9 | 485305.1 | 0.71 | 0.99   | 0.37 | 0.94   |
| gi15238533  | 40S ribosomal protein S3-3                                           | 5.24  | 3  | 19.1   | 243344.6 | 164318.8 | 287570.3 | 0.68 | 1.18   | 0.38 | 0.63   |



|             |                                                          |       |    |        |          |          |          |      |        |      |        |
|-------------|----------------------------------------------------------|-------|----|--------|----------|----------|----------|------|--------|------|--------|
| gi15220372  | putative 60S ribosomal protein L30-1                     | 34.82 | 7  | 32.8   | 206322.3 | 287417.9 | n.e.v.   | 1.39 | n.e.v. | 0.38 | n.e.v. |
| gi18422289  | Granulin repeat cysteine protease family protein         | 11.02 | 5  | 47.08  | 143695.5 | 402403.7 | 255139.1 | 2.80 | 1.78   | 0.38 | 0.08   |
| gi15232603  | 60S acidic ribosomal protein P0-2                        | 44.69 | 16 | 110.25 | 498277   | 349160.8 | 189787.9 | 0.70 | 0.38   | 0.39 | 0.14   |
| gi334185190 | heat shock protein 70-3                                  | 25.42 | 40 | 255.43 | 1392172  | 1762013  | 2459512  | 1.27 | 1.77   | 0.39 | 0.07   |
| gi15237054  | V-type proton ATPase subunit E1                          | 10.43 | 5  | 60.69  | 123264.4 | 216234.7 | 121186.2 | 1.75 | 0.98   | 0.39 | 0.97   |
| gi186521400 | ATP synthase subunit beta-1                              | 37.95 | 69 | 415.2  | 2907771  | 2506249  | 2083053  | 0.86 | 0.72   | 0.40 | 0.40   |
| gi30687350  | Elongation factor 1-beta 2                               | 16.96 | 11 | 50.5   | 191020   | 93444.83 | 137135.3 | 0.49 | 0.72   | 0.40 | 0.19   |
| gi79313167  | 60S ribosomal protein L4-1                               | 2.72  | 1  | 22.78  | 170799.3 | 242917.2 | 81244.15 | 1.42 | 0.48   | 0.40 | 0.20   |
| gi15234781  | peptidyl-prolyl cis-trans isomerase CYP1                 | 39.53 | 12 | 105.95 | 577885.3 | 746948.6 | 767629   | 1.29 | 1.33   | 0.41 | 0.30   |
| gi15231024  | T-complex protein 1 subunit alpha                        | 7.34  | 4  | 40.89  | 135802.8 | 51421.25 | n.e.v.   | 0.38 | n.e.v. | 0.41 | n.e.v. |
| gi30686836  | dehydrin ERD10                                           | 25.1  | 9  | 52.87  | 349229.8 | 525961.6 | 243301.7 | 1.51 | 0.70   | 0.41 | 0.34   |
| gi15229809  | uncharacterized protein                                  | 5.88  | 3  | 11.57  | 113424.6 | 170400.4 | 199748.1 | 1.50 | 1.76   | 0.41 | 0.62   |
| gi15235944  | uncharacterized protein                                  | 4.49  | 1  | 23.02  | 97156.15 | 57556.29 | n.e.v.   | 0.59 | n.e.v. | 0.43 | n.e.v. |
| gi79327017  | clathrin adaptor complexes medium subunit family protein | 2.09  | 2  | 9.87   | 133907.1 | 346761.6 | 95557.14 | 2.59 | 0.71   | 0.43 | 0.32   |
| gi79325175  | Glutathione S-transferase family protein                 | 14.38 | 6  | 26.05  | 209693   | 151900.8 | 53030.94 | 0.72 | 0.25   | 0.44 | 0.16   |
| gi15239136  | thioredoxin H3                                           | 11.86 | 1  | 5.96   | 68507.55 | 123920.5 | 106366.6 | 1.81 | 1.55   | 0.44 | 0.71   |
| gi79314469  | UDP-XYL synthase 5                                       | 12.32 | 8  | 52.27  | 89032.04 | 136128.9 | 88169.24 | 1.53 | 0.99   | 0.44 | 0.99   |
| gi22331875  | cysteine synthase C                                      | 8.37  | 4  | 54.96  | 87683.57 | 117906   | n.e.v.   | 1.34 | n.e.v. | 0.45 | n.e.v. |
| gi334187803 | chaperonin 20                                            | 11.86 | 3  | 21.64  | 47278.56 | 101828   | n.e.v.   | 2.15 | n.e.v. | 0.46 | n.e.v. |
| gi18398761  | 60S ribosomal protein L9-1                               | 8.76  | 3  | 53.49  | 172740   | 111122.6 | 208685.7 | 0.64 | 1.21   | 0.47 | 0.69   |
| gi18411224  | 40S ribosomal protein S13-2                              | 7.95  | 1  | 10.76  | 58949.64 | 42017.33 | 36569.27 | 0.71 | 0.62   | 0.48 | 0.41   |
| gi15240080  | MATE efflux family protein                               | 4.89  | 1  | 23.82  | 43947.61 | 123290.5 | n.e.v.   | 2.81 | n.e.v. | 0.48 | n.e.v. |
| gi30685167  | 40S ribosomal protein S12-2                              | 9.03  | 4  | 21.89  | 222250.7 | 348313.8 | 114499   | 1.57 | 0.52   | 0.48 | 0.29   |
| gi334186086 | ketol-acid reductoisomerase                              | 8.8   | 9  | 69.08  | 154381   | 96835.4  | 106170.7 | 0.63 | 0.69   | 0.48 | 0.59   |
| gi7525040   | ATP synthase CF1 beta subunit                            | 6.22  | 2  | 26.01  | 49981.98 | 41045.72 | n.e.v.   | 0.82 | n.e.v. | 0.49 | n.e.v. |
| gi15226185  | fructose-bisphosphate aldolase 3                         | 20.46 | 13 | 83.97  | 703673.9 | 419880.6 | 642582.9 | 0.60 | 0.91   | 0.49 | 0.88   |
| gi15230534  | heat shock protein 70-4                                  | 17.85 | 27 | 196.33 | 1176706  | 1406763  | 1493865  | 1.20 | 1.27   | 0.50 | 0.26   |
| gi79314572  | 40S ribosomal protein S20-2                              | 9.84  | 1  | 10.98  | 78697.45 | 200038.5 | 108057.5 | 2.54 | 1.37   | 0.51 | 0.78   |
| gi15226231  | 60S acidic ribosomal protein P2-1                        | 54.78 | 9  | 49.21  | 262379.2 | 370785.5 | 207903.2 | 1.41 | 0.79   | 0.51 | 0.63   |
| gi334185072 | 60S ribosomal protein L23                                | 28    | 10 | 41.17  | 101857.1 | 76797.7  | 136349.5 | 0.75 | 1.34   | 0.53 | 0.42   |
| gi15225798  | 3-ketoacyl-CoA thiolase 2                                | 24.68 | 14 | 83.38  | 356263.9 | 387675.9 | 511825.1 | 1.09 | 1.44   | 0.53 | 0.15   |
| gi79321519  | heat shock protein 91                                    | 14.7  | 19 | 135.59 | 164377   | 226335.7 | 151683.4 | 1.38 | 0.92   | 0.55 | 0.87   |

|             |                                                               |       |    |        |          |          |          |      |        |      |        |
|-------------|---------------------------------------------------------------|-------|----|--------|----------|----------|----------|------|--------|------|--------|
| gi15231702  | monodehydroascorbate reductase (NADH)                         | 11.29 | 5  | 45.13  | 128455.5 | 93598.86 | 97754.87 | 0.73 | 0.76   | 0.55 | 0.32   |
| gi79327837  | isopropylmalate dehydrogenase 1                               | 19.33 | 12 | 71.98  | 188766.5 | 123342.6 | 291064   | 0.65 | 1.54   | 0.56 | 0.49   |
| gi15231814  | 60S ribosomal protein L12-2                                   | 35.54 | 12 | 63.43  | 331698.6 | 549980.6 | n.e.v.   | 1.66 | n.e.v. | 0.56 | n.e.v. |
| gi15240765  | voltage dependent anion channel 2                             | 11.96 | 5  | 51.94  | 148394.6 | 130197.9 | 110167   | 0.88 | 0.74   | 0.58 | 0.01   |
| gi15221770  | T-complex protein 1 subunit epsilon                           | 11.03 | 4  | 34.4   | 38947.6  | 73784.2  | n.e.v.   | 1.89 | n.e.v. | 0.60 | n.e.v. |
| gi15222639  | 6-phosphogluconate dehydrogenase, decarboxylating 1           | 24.85 | 26 | 123.06 | 378339.7 | 488448   | n.e.v.   | 1.29 | n.e.v. | 0.61 | n.e.v. |
| gi15223138  | 12-oxophytodienoate reductase 1                               | 15.59 | 6  | 66.67  | 180334.3 | 160825.7 | n.e.v.   | 0.89 | n.e.v. | 0.61 | n.e.v. |
| gi15232845  | probable mitochondrial-processing peptidase subunit beta      | 15.25 | 16 | 137.88 | 497740.7 | 420516.8 | 424944.6 | 0.84 | 0.85   | 0.62 | 0.58   |
| gi79313339  | alpha/beta-Hydrolases superfamily protein                     | 14.83 | 6  | 38.09  | 119444.4 | 171868.8 | n.e.v.   | 1.44 | n.e.v. | 0.63 | n.e.v. |
| gi15220463  | peroxidase 3                                                  | 4.6   | 4  | 30.02  | 175978   | 223155.6 | 212490.2 | 1.27 | 1.21   | 0.63 | 0.67   |
| gi15239571  | caffeic acid/5-hydroxyferulic acid O-methyltransferase        | 22.31 | 12 | 78.91  | 258577.8 | 243015.9 | 289862.9 | 0.94 | 1.12   | 0.64 | 0.70   |
| gi15232776  | cell division control protein 48-A                            | 10.51 | 9  | 86.29  | 339664.5 | 418279.5 | 200181.2 | 1.23 | 0.59   | 0.64 | 0.36   |
| gi18423628  | universal stress protein (USP) family protein                 | 9.92  | 1  | 6.6    | 60304.91 | 101342.8 | n.e.v.   | 1.68 | n.e.v. | 0.65 | n.e.v. |
| gi30697913  | Histidinol dehydrogenase                                      | 2.88  | 1  | 14.2   | 44488.05 | 65246.91 | n.e.v.   | 1.47 | n.e.v. | 0.66 | n.e.v. |
| gi297834302 | ATPME3 [ <i>Arabidopsis lyrata</i> subsp. <i>lyrata</i> ]     | 4.58  | 5  | 51.65  | 306291.3 | 244552   | 427709.9 | 0.80 | 1.40   | 0.66 | 0.44   |
| gi7525041   | ribulose-1,5-bisphosphate carboxylase/oxygenase large subunit | 12.73 | 7  | 62.69  | 198359.1 | 242585.4 | n.e.v.   | 1.22 | n.e.v. | 0.67 | n.e.v. |
| gi15228276  | translationally-controlled tumor protein-like protein         | 26.19 | 9  | 50     | 137549.9 | 94528.87 | n.e.v.   | 0.69 | n.e.v. | 0.69 | n.e.v. |
| gi18400762  | chloroplast inner membrane localized protein                  | 9.52  | 7  | 29.23  | 73150.74 | 76366.95 | 177561.8 | 1.04 | 2.43   | 0.69 | 0.21   |
| gi15222929  | V-type proton ATPase subunit B1                               | 35.39 | 25 | 162.76 | 483320.7 | 538461.2 | 581760.4 | 1.11 | 1.20   | 0.71 | 0.57   |
| gi186509939 | monodehydroascorbate reductase (NADH)                         | 4.39  | 1  | 14.9   | 81578.19 | 102903.9 | 142710.1 | 1.26 | 1.75   | 0.71 | 0.32   |
| gi15242516  | actin 7                                                       | 20.95 | 13 | 105.99 | 533993.4 | 498986   | 666088.8 | 0.93 | 1.25   | 0.72 | 0.18   |
| gi30687359  | phosphoenolpyruvate carboxylase family protein                | 9.52  | 2  | 18.38  | 593145.6 | 683454.6 | 552464.4 | 1.15 | 0.93   | 0.73 | 0.77   |
| gi30693966  | Luminal-binding protein 2                                     | 16.64 | 28 | 193.03 | 757719.4 | 702395.8 | 308540.6 | 0.93 | 0.41   | 0.73 | 0.06   |
| gi18391442  | V-type proton ATPase subunit C                                | 7.73  | 3  | 28.07  | 113566.5 | 84752.94 | n.e.v.   | 0.75 | n.e.v. | 0.74 | n.e.v. |
| gi18399899  | PLAT-plant-stress domain-containing protein                   | 23.5  | 6  | 43.3   | 74246.38 | 87612.09 | n.e.v.   | 1.18 | n.e.v. | 0.76 | n.e.v. |
| gi79320145  | elongation factor EF-1 gamma subunit                          | 12.83 | 8  | 47.89  | 187487.8 | 173485.7 | 123947   | 0.93 | 0.66   | 0.77 | 0.38   |
| gi18403295  | gamma-aminobutyrate transaminase POP2                         | 11.31 | 7  | 40.5   | 135639.3 | 140865.3 | 144494.3 | 1.04 | 1.07   | 0.81 | 0.69   |
| gi18407630  | beta-fructofuranosidase                                       | 9.26  | 13 | 84.92  | 322865.7 | 295665.8 | 388350.4 | 0.92 | 1.20   | 0.82 | 0.65   |

|             |                                                                                                                        |       |    |        |          |          |          |        |        |        |        |
|-------------|------------------------------------------------------------------------------------------------------------------------|-------|----|--------|----------|----------|----------|--------|--------|--------|--------|
| gi30696930  | Monodehydroascorbate reductase                                                                                         | 19.09 | 19 | 121.05 | 867706.9 | 931626.1 | 994118.5 | 1.07   | 1.15   | 0.85   | 0.72   |
| gi18425082  | gamma carbonic anhydrase 3                                                                                             | 5.04  | 1  | 15.24  | 120511   | 110314.7 | n.e.v.   | 0.92   | n.e.v. | 0.85   | n.e.v. |
| gi18398038  | galactose oxidase/kelch repeat-containing protein                                                                      | 3.65  | 3  | 12.87  | 36533.75 | 38950.96 | 53018.84 | 1.07   | 1.45   | 0.85   | 0.40   |
| gi30696056  | elongation factor EF-2                                                                                                 | 28    | 43 | 312.56 | 878604.3 | 833860.6 | 764487.1 | 0.95   | 0.87   | 0.86   | 0.63   |
| gi15240075  | succinate dehydrogenase [ubiquinone] flavoprotein subunit 1                                                            | 14.51 | 10 | 52.64  | 139569.6 | 122781.1 | n.e.v.   | 0.88   | n.e.v. | 0.87   | n.e.v. |
| gi22331076  | Subtilase family protein                                                                                               | 1.67  | 2  | 13.71  | 139299.1 | 155701.9 | 45854.63 | 1.12   | 0.33   | 0.87   | 0.17   |
| gi145333007 | Nascent polypeptide-associated complex subunit alpha-like protein 4                                                    | 7.11  | 5  | 40.4   | 299610.7 | 275094.5 | 106772.6 | 0.92   | 0.36   | 0.87   | 0.25   |
| gi15229530  | glutamine synthetase cytosolic isozyme 1-3                                                                             | 4.52  | 4  | 43.01  | 82226.7  | 77084.28 | 70161.39 | 0.94   | 0.85   | 0.90   | 0.72   |
| gi15220941  | WD-40 repeat ArcA-like protein                                                                                         | 17.43 | 7  | 90.15  | 221660   | 213089.7 | 171585.7 | 0.96   | 0.77   | 0.91   | 0.47   |
| gi15237853  | UDP-glucuronic acid decarboxylase 3                                                                                    | 12.28 | 7  | 52.42  | 86856.38 | 92710.75 | 52710.17 | 1.07   | 0.61   | 0.91   | 0.53   |
| gi15227257  | ATP synthase subunit gamma                                                                                             | 22.46 | 10 | 64.24  | 149112.8 | 158408.4 | n.e.v.   | 1.06   | n.e.v. | 0.91   | n.e.v. |
| gi15232820  | malate dehydrogenase                                                                                                   | 34    | 20 | 125.56 | 581272.8 | 598337.7 | 631753.1 | 1.03   | 1.09   | 0.92   | 0.72   |
| gi240255920 | putative beta-1,3-endoglucanase that interacts with the 30C02 cyst nematode effector. May play a role in host defense. | 9.59  | 2  | 30.23  | 126910.8 | 138988.2 | n.e.v.   | 1.10   | n.e.v. | 0.92   | n.e.v. |
| gi15239652  | flavodoxin-like quinone reductase 1                                                                                    | 16.18 | 4  | 27.74  | 191462.7 | 179291.8 | 215537.3 | 0.94   | 1.13   | 0.93   | 0.85   |
| gi15237548  | 40S ribosomal protein S28-1                                                                                            | 18.75 | 2  | 9.98   | 72985.71 | 77092.71 | 132498   | 1.06   | 1.82   | 0.93   | 0.50   |
| gi15236566  | polyketide cyclase/dehydrase and lipid transport superfamily protein                                                   | 7.28  | 1  | 43.49  | 181644.9 | 173051.3 | 185643.5 | 0.95   | 1.02   | 0.94   | 0.94   |
| gi145323784 | L-ascorbate peroxidase 1                                                                                               | 12.05 | 7  | 95.46  | 131688.2 | 127523.7 | 66033.87 | 0.97   | 0.50   | 0.94   | 0.22   |
| gi15225103  | glutathione peroxidase GPx                                                                                             | 7.69  | 4  | 30.94  | 166707.6 | 171230.7 | 126960.7 | 1.03   | 0.76   | 0.95   | 0.40   |
| gi334183935 | dehydrin ERD14                                                                                                         | 7.03  | 5  | 26.69  | 78409.02 | 76113.45 | 35279.99 | 0.97   | 0.45   | 0.96   | 0.19   |
| gi15231715  | fructose-bisphosphate aldolase                                                                                         | 43.58 | 34 | 229.3  | 2494621  | 2478479  | 2067356  | 0.99   | 0.83   | 0.96   | 0.31   |
| gi15242465  | soluble inorganic pyrophosphatase 1                                                                                    | 8     | 2  | 35     | 93259.8  | 94329.73 | 244143.1 | 1.01   | 2.62   | 0.97   | 0.12   |
| gi334188531 | protein disulfide isomerase-like 1-4                                                                                   | 2.63  | 1  | 16.05  | 118331.9 | 121752.5 | 180427   | 1.03   | 1.52   | 0.98   | 0.63   |
| gi145323706 | Rossmann-fold NAD(P)-binding domain-containing protein                                                                 | 5.38  | 2  | 13.49  | 119203.8 | 165346.8 | 122228.6 | 1.39   | 1.03   | 0.98   | 0.23   |
| gi79320796  | glutamine synthetase                                                                                                   | 35.66 | 12 | 73.52  | 351937.2 | 349584.1 | 545855.2 | 0.99   | 1.55   | 0.98   | 0.34   |
| gi15221284  | putative calcium-binding protein CML13                                                                                 | 10.81 | 2  | 21.04  | 233085.5 | 230435   | n.e.v.   | 0.99   | n.e.v. | 0.98   | n.e.v. |
| gi15219406  | glyceraldehyde-3-phosphate dehydrogenase of plastid                                                                    | 22.51 | 14 | 70.62  | 450783.7 | 447730.4 | 429739.2 | 0.99   | 0.95   | 0.99   | 0.88   |
| gi79326317  | catalase 2                                                                                                             | 6.54  | 4  | 63.72  | 141989.2 | 86071.98 | 341622.3 | 0.61   | 2.41   | 0.56   | 0.11   |
| gi145334543 | 26S proteasome non-ATPase regulatory subunit 14                                                                        | 5.79  | 1  | 16.82  | 36019.95 | n.e.v.   | 43408.75 | n.e.v. | 1.21   | n.e.v. | 0.82   |

|             |                                                               |       |    |        |          |        |          |        |      |        |      |
|-------------|---------------------------------------------------------------|-------|----|--------|----------|--------|----------|--------|------|--------|------|
| gi145362282 | spermidine synthase 1                                         | 13.15 | 5  | 39.49  | 115616.4 | n.e.v. | 103808   | n.e.v. | 0.90 | n.e.v. | 0.89 |
| gi15220668  | putative phosphoglucomutase                                   | 2.4   | 1  | 28.2   | 40091.76 | n.e.v. | 10533.42 | n.e.v. | 0.26 | n.e.v. | 0.24 |
| gi15222163  | glutathione S-transferase DHAR2                               | 5.16  | 1  | 5.53   | 54461.99 | n.e.v. | 63786.79 | n.e.v. | 1.17 | n.e.v. | 0.75 |
| gi15229062  | 4-coumarate--CoA ligase-like 10                               | 2.53  | 2  | 30.71  | 67040.88 | n.e.v. | 80302.71 | n.e.v. | 1.20 | n.e.v. | 0.74 |
| gi15229231  | glyceraldehyde-3-phosphate dehydrogenase C subunit 1          | 54.14 | 67 | 408.73 | 2139642  | n.e.v. | 2594521  | n.e.v. | 1.21 | n.e.v. | 0.18 |
| gi15229595  | TCP-1/cpn60 chaperonin family protein                         | 6.72  | 4  | 42.74  | 100980.1 | n.e.v. | 92050.24 | n.e.v. | 0.91 | n.e.v. | 0.73 |
| gi15232058  | peroxidase 27                                                 | 9.66  | 3  | 24     | 54508.31 | n.e.v. | 37508.78 | n.e.v. | 0.69 | n.e.v. | 0.31 |
| gi15232074  | voltage dependent anion channel 1                             | 11.23 | 6  | 46.72  | 273267.4 | n.e.v. | 78210.07 | n.e.v. | 0.29 | n.e.v. | 0.08 |
| gi15235280  | ADP/ATP carrier 3 protein                                     | 2.9   | 2  | 31.95  | 71026.49 | n.e.v. | 200950.3 | n.e.v. | 2.83 | n.e.v. | 0.08 |
| gi15236376  | adenosylhomocysteinase                                        | 28.45 | 23 | 166.19 | 662582.2 | n.e.v. | 726896.3 | n.e.v. | 1.10 | n.e.v. | 0.72 |
| gi15236932  | Isocitrate dehydrogenase [NAD] regulatory subunit 1           | 7.08  | 3  | 33.72  | 66444.4  | n.e.v. | 108913.1 | n.e.v. | 1.64 | n.e.v. | 0.13 |
| gi15238025  | NADH--cytochrome B5 reductase 1                               | 6.76  | 3  | 13.06  | 34881.67 | n.e.v. | 63898.6  | n.e.v. | 1.83 | n.e.v. | 0.56 |
| gi15238104  | TIR-NBS-LRR class disease resistance protein                  | 1.35  | 1  | 25.67  | 14663.69 | n.e.v. | 13795.55 | n.e.v. | 0.94 | n.e.v. | 0.93 |
| gi15238776  | cytochrome B5 isoform E                                       | 11.19 | 5  | 22.74  | 75165.04 | n.e.v. | 121170.5 | n.e.v. | 1.61 | n.e.v. | 0.59 |
| gi15242351  | reversibly glycosylated polypeptide 2                         | 11.94 | 8  | 47.85  | 158284   | n.e.v. | 142398.4 | n.e.v. | 0.90 | n.e.v. | 0.84 |
| gi18379244  | MLP-like protein 329                                          | 15.23 | 7  | 71.73  | 210160   | n.e.v. | 255337.5 | n.e.v. | 1.21 | n.e.v. | 0.20 |
| gi18401345  | Adenine nucleotide alpha hydrolases-like superfamily protein  | 11.04 | 2  | 16.24  | 38976.06 | n.e.v. | 30912.31 | n.e.v. | 0.79 | n.e.v. | 0.23 |
| gi18406515  | citrate synthase 4                                            | 11.63 | 3  | 24.56  | 56884.96 | n.e.v. | 74330.12 | n.e.v. | 1.31 | n.e.v. | 0.57 |
| gi18410982  | S-phase kinase-associated protein 1                           | 9.38  | 6  | 30.72  | 79933.94 | n.e.v. | 41013.33 | n.e.v. | 0.51 | n.e.v. | 0.10 |
| gi186504418 | aspartate aminotransferase                                    | 7.21  | 5  | 48.47  | 118972.7 | n.e.v. | 107089.3 | n.e.v. | 0.90 | n.e.v. | 0.70 |
| gi186510565 | short-chain dehydrogenase reductase 4                         | 4.62  | 1  | 3.27   | 70809.8  | n.e.v. | 92597.47 | n.e.v. | 1.31 | n.e.v. | 0.48 |
| gi186532608 | elongation factor 1-alpha 4                                   | 18.71 | 13 | 166.82 | 851893.7 | n.e.v. | 646468.9 | n.e.v. | 0.76 | n.e.v. | 0.70 |
| gi238479752 | ribosomal protein S5/Elongation factor G/III/V family protein | 12.07 | 12 | 120.95 | 330763.5 | n.e.v. | 389038.9 | n.e.v. | 1.18 | n.e.v. | 0.64 |
| gi238480186 | HSP20-like chaperone                                          | 5.83  | 4  | 31.09  | 140796.2 | n.e.v. | 131995.7 | n.e.v. | 0.94 | n.e.v. | 0.27 |
| gi30678090  | Chaperone protein htpG family protein                         | 8.11  | 5  | 74.15  | 46704.59 | n.e.v. | 117455.9 | n.e.v. | 2.51 | n.e.v. | 0.09 |
| gi30678559  | 6-phosphogluconate dehydrogenase, decarboxylating 3           | 16.46 | 21 | 100.22 | 168067.9 | n.e.v. | 399081.3 | n.e.v. | 2.37 | n.e.v. | 0.10 |
| gi30680575  | phosphoglycerate mutase, 2,3-bisphosphoglycerate-independent  | 7.68  | 6  | 81.7   | 312741.8 | n.e.v. | 290315.7 | n.e.v. | 0.93 | n.e.v. | 0.84 |
| gi30689398  | Cytochrome bd ubiquinol oxidase                               | 23.76 | 2  | 17.95  | 98895.74 | n.e.v. | 35175.03 | n.e.v. | 0.36 | n.e.v. | 0.37 |
| gi30697298  | actin depolymerizing factor 3                                 | 39.52 | 4  | 29.55  | 298772.3 | n.e.v. | 120221.8 | n.e.v. | 0.40 | n.e.v. | 0.13 |

|             |                                          |       |    |        |          |        |          |        |      |        |      |
|-------------|------------------------------------------|-------|----|--------|----------|--------|----------|--------|------|--------|------|
| gi334185304 | DNA damage-inducible protein 1           | 6.54  | 1  | 16.31  | 49348.04 | n.e.v. | 38277.77 | n.e.v. | 0.78 | n.e.v. | 0.67 |
| gi334185905 | putative nuclear DNA-binding protein G2p | 2.6   | 1  | 35.08  | 38657.68 | n.e.v. | 41094.57 | n.e.v. | 1.06 | n.e.v. | 0.93 |
| gi79313259  | Nitrile-specifier protein 1              | 19.15 | 14 | 117.46 | 522573.8 | n.e.v. | 709536.5 | n.e.v. | 1.36 | n.e.v. | 0.14 |
| gi79313984  | putative UDP-glucose 6-dehydrogenase 1   | 13.13 | 10 | 52.98  | 193145.2 | n.e.v. | 176687.1 | n.e.v. | 0.91 | n.e.v. | 0.82 |
| gi79314743  | 20S proteasome alpha subunit PAD1        | 10.29 | 4  | 24.71  | 121630.3 | n.e.v. | 86787.95 | n.e.v. | 0.71 | n.e.v. | 0.50 |
| gi79317690  | glyoxalase I homolog                     | 5.17  | 2  | 20.81  | 186687.6 | n.e.v. | 203659.3 | n.e.v. | 1.09 | n.e.v. | 0.91 |
| gi79329220  | 14-3-3-like protein GF14 psi             | 12.99 | 14 | 111.3  | 218467.6 | n.e.v. | 198983   | n.e.v. | 0.91 | n.e.v. | 0.88 |
| gi79587736  | glyoxalase I homolog                     | 14.49 | 7  | 47.52  | 240875.1 | n.e.v. | 406470.3 | n.e.v. | 1.69 | n.e.v. | 0.71 |

**Table S3.** Quantification details of proteins identified in aerial parts of Arabidopsis *fra2* and *ktn1-2* mutant seedlings. Proteins with significantly changed abundance in the mutants compared to wild type (Col-0) are highlighted in green. n.e.v. = not enough values; n.a. = not applicable

| Accession  | Description                                      | Coverage Average | # Peptides Average | Score Average | intensity average Col-0 | intensity average <i>fra2</i> | intensity average <i>ktn1-2</i> | Fold change          |                        | P value              |                        |
|------------|--------------------------------------------------|------------------|--------------------|---------------|-------------------------|-------------------------------|---------------------------------|----------------------|------------------------|----------------------|------------------------|
|            |                                                  |                  |                    |               |                         |                               |                                 | <i>fra2</i> vs Col-0 | <i>ktn1-2</i> vs Col-0 | <i>fra2</i> vs Col-0 | <i>ktn1-2</i> vs Col-0 |
| gi18421172 | F-box protein                                    | 2.8              | 3                  | 22.92         | 1525934.87              | 1496285.72                    | 458709.01                       | 0.98                 | 0.30                   | 0.962                | 0.001                  |
| gi18422548 | ATP-dependent Clp protease proteolytic subunit 4 | 29.79            | 14                 | 92.62         | 4296557.72              | 2994015.35                    | 2780555.61                      | 0.70                 | 0.65                   | 0.236                | 0.002                  |
| gi30699430 | phosphoglycerate kinase                          | 29.18            | 15                 | 104.21        | 13776048.64             | 15493346.42                   | 7708960.73                      | 1.12                 | 0.56                   | 0.215                | 0.003                  |
| gi15222551 | phosphoribulokinase                              | 49.37            | 34                 | 253.28        | 29224342.73             | 21370677.20                   | 15460624.58                     | 0.73                 | 0.53                   | 0.061                | 0.003                  |
| gi79317147 | 50S ribosomal protein L4                         | 14.39            | 12                 | 86.58         | 7808895.67              | 1985714.83                    | 2279779.83                      | 0.25                 | 0.29                   | 0.005                | 0.003                  |
| gi15230595 | phosphoglycerate kinase 1                        | 67.78            | 107                | 689.86        | 99022520.01             | 73663523.69                   | 28363047.45                     | 0.74                 | 0.29                   | 0.026                | 0.003                  |
| gi15230544 | 50S ribosomal protein L9                         | 17.77            | 8                  | 44.65         | 4315620.38              | 3353938.95                    | 2213732.12                      | 0.78                 | 0.51                   | 0.139                | 0.003                  |
| gi15218708 | photosystem I reaction center subunit D-2        | 35.78            | 18                 | 147.36        | 29928939.40             | 20989637.76                   | 45286749.26                     | 0.70                 | 1.51                   | 0.108                | 0.004                  |
| gi15237739 | cyclophilin ROC7                                 | 5.88             | 4                  | 30.68         | 10957142.37             | 3657898.57                    | 3546535.06                      | 0.33                 | 0.32                   | 0.002                | 0.004                  |
| gi15220620 | hydroxypyruvate reductase                        | 33.94            | 18                 | 109.34        | 7611724.98              | 7507159.98                    | 11718680.82                     | 0.99                 | 1.54                   | 0.953                | 0.004                  |
| gi30697298 | actin depolymerizing factor 3                    | 29.84            | 4                  | 26.88         | 2798163.88              | 3931799.27                    | 844293.53                       | 1.41                 | 0.30                   | 0.256                | 0.005                  |
| gi15230982 | peroxiredoxin Q                                  | 28.24            | 12                 | 95.05         | 9363992.23              | 5543512.31                    | 3980676.95                      | 0.59                 | 0.43                   | 0.042                | 0.005                  |
| gi30692346 | small subunit ribosomal protein S1               | 23.56            | 16                 | 103.48        | 8943813.19              | 5884181.99                    | 5048811.79                      | 0.66                 | 0.56                   | 0.055                | 0.005                  |

|             |                                                                |       |     |         |              |              |              |        |      |        |       |
|-------------|----------------------------------------------------------------|-------|-----|---------|--------------|--------------|--------------|--------|------|--------|-------|
| gi18404496  | NAD(P)-binding Rossmann-fold-containing protein                | 26.15 | 11  | 82.92   | 8607872.32   | 5447058.47   | 5603099.42   | 0.63   | 0.65 | 0.008  | 0.007 |
| gi15231715  | fructose-bisphosphate aldolase                                 | 26.26 | 14  | 107.52  | 11694893.04  | 14913979.01  | 5815125.12   | 1.28   | 0.50 | 0.042  | 0.007 |
| gi15217918  | DNA-damage resistance protein DRT112                           | 38.92 | 11  | 66.51   | 13493270.03  | 2986221.23   | 4416446.13   | 0.22   | 0.33 | 0.011  | 0.007 |
| gi42573724  | lactate/malate dehydrogenase family protein                    | 25.45 | 11  | 56.46   | 6669811.14   | 6626916.60   | 3797117.68   | 0.99   | 0.57 | 0.960  | 0.007 |
| gi15232603  | 60S acidic ribosomal protein P0-2                              | 21.56 | 11  | 82.08   | 9543945.84   | 4587130.63   | 4871300.09   | 0.48   | 0.51 | 0.001  | 0.009 |
| gi15229349  | ribose 5-phosphate isomerase A                                 | 23.19 | 12  | 63.28   | 10874344.78  | 9538380.22   | 6773457.57   | 0.88   | 0.62 | 0.190  | 0.009 |
| gi18417239  | photosystem II reaction center PSB28 protein                   | 6.01  | 2   | 9.41    | 801932.90    | 1470543.52   | 2235577.13   | 1.83   | 2.79 | 0.062  | 0.010 |
| gi18417320  | elongation factor Ts family protein                            | 3.15  | 2   | 140.37  | 2240299.62   | 2437842.21   | 4520013.96   | 1.09   | 2.02 | 0.804  | 0.014 |
| gi15220216  | annexin 1                                                      | 3.79  | 3   | 29.09   | 2805234.71   | 4684400.46   | 1554300.17   | 1.67   | 0.55 | 0.000  | 0.014 |
| gi15236531  | microfibrillar-associated protein-like protein                 | 3.45  | 3   | 21.26   | 680626.00    | n.e.v.       | 1477020.25   | n.e.v. | 2.17 | n.e.v. | 0.015 |
| gi30696056  | elongation factor EF-2                                         | 15.42 | 21  | 153.47  | 8767528.43   | 14268445.56  | 6254971.93   | 1.63   | 0.66 | 0.065  | 0.018 |
| gi7525041   | ribulose-1,5-bisphosphate carboxylase/oxygenase large subunit  | 49.27 | 185 | 1453.91 | 411927407.76 | 294914235.63 | 277266195.81 | 0.72   | 0.66 | 0.019  | 0.019 |
| gi238479213 | ribulose biphosphate carboxylase large chain, catalytic domain | 25    | 13  | 95.85   | 15069515.17  | 10777815.24  | 9451326.29   | 0.72   | 0.63 | 0.021  | 0.021 |
| gi79314769  | RNA recognition motif-containing protein                       | 11.86 | 3   | 52.67   | 3096627.62   | 4322926.07   | 1443801.71   | 1.40   | 0.47 | 0.305  | 0.021 |
| gi15231137  | endoribonuclease L-PSP family protein                          | 25.13 | 6   | 37.64   | 3014346.53   | 2626481.52   | 1390369.98   | 0.87   | 0.46 | 0.472  | 0.022 |
| gi18410833  | 50S ribosomal protein L31                                      | 9.72  | 3   | 18.37   | 6417292.09   | 2295801.19   | 4254452.45   | 0.36   | 0.66 | 0.007  | 0.023 |
| gi145323698 | 60S acidic ribosomal protein P1-1                              | 16.67 | 3   | 11.72   | 1361039.66   | 1734301.84   | 370706.66    | 1.27   | 0.27 | 0.362  | 0.023 |
| gi18420758  | uncharacterized protein                                        | 42.67 | 5   | 24      | 71493.56     | 31188.08     | 408371.85    | 0.44   | 5.71 | 0.003  | 0.024 |
| gi15224648  | membrane-associated progesterone binding protein 2             | 30    | 4   | 19.5    | 1728692.29   | 1892273.62   | 959780.25    | 1.09   | 0.56 | 0.623  | 0.025 |
| gi15232820  | malate dehydrogenase                                           | 16.38 | 9   | 64.98   | 6601561.31   | 5052235.71   | 2813838.31   | 0.77   | 0.43 | 0.464  | 0.026 |
| gi15242465  | soluble inorganic pyrophosphatase 1                            | 21.67 | 10  | 76.03   | 11022571.57  | 5807403.25   | 5763606.13   | 0.53   | 0.52 | 0.044  | 0.027 |
| gi26557005  | ATPase subunit 1                                               | 4.54  | 3   | 50.6    | 2793480.24   | 7217395.44   | 5089236.13   | 2.58   | 1.82 | 0.007  | 0.030 |
| gi30681492  | glycine-rich RNA-binding protein 7                             | 18.87 | 8   | 53.05   | 9935985.08   | 8804814.06   | 4317353.95   | 0.89   | 0.43 | 0.545  | 0.030 |
| gi18412632  | ATP synthase gamma chain 1                                     | 39.14 | 25  | 154.86  | 24872995.56  | 16236642.88  | 17444031.98  | 0.65   | 0.70 | 0.022  | 0.030 |
| gi15235745  | serine transhydroxymethyltransferase 1                         | 25.53 | 27  | 215.92  | 19247529.43  | 18987719.17  | 15749313.32  | 0.99   | 0.82 | 0.911  | 0.031 |
| gi15235029  | chlorophyll a-b binding protein CP26                           | 31.43 | 9   | 64.98   | 4581201.95   | 9236218.52   | 6837980.22   | 2.02   | 1.49 | 0.056  | 0.033 |
| gi15241286  | pyruvate dehydrogenase E1 beta                                 | 4.41  | 3   | 16.33   | 1206930.24   | 1328676.98   | 548799.25    | 1.10   | 0.45 | 0.665  | 0.037 |
| gi15228194  | Sedoheptulose-1,7-bisphosphatase                               | 17.3  | 11  | 120.86  | 8304146.35   | 13526281.91  | 13754753.35  | 1.63   | 1.66 | 0.010  | 0.045 |
| gi15234637  | photosystem II subunit Q-2                                     | 32.61 | 14  | 105.66  | 9345172.06   | 11457444.74  | 13596700.72  | 1.23   | 1.50 | 0.279  | 0.051 |
| gi30684767  | ATP-dependent zinc metalloprotease FTSH 2                      | 22.73 | 15  | 111.71  | 10406900.99  | 5403906.75   | 6122905.04   | 0.52   | 0.59 | 0.027  | 0.052 |

|             |                                                                           |       |    |        |             |             |             |                         |        |       |        |
|-------------|---------------------------------------------------------------------------|-------|----|--------|-------------|-------------|-------------|-------------------------|--------|-------|--------|
| gi18415805  | ferredoxin/thioredoxin reductase subunit A (variable subunit) 2           | 7.61  | 3  | 16.73  | 2441812.37  | 895399.11   | 1305568.55  | 0.37                    | 0.53   | 0.011 | 0.053  |
| gi30680156  | fructose-bisphosphate aldolase 4                                          | 12.53 | 9  | 44.56  | 8102332.78  | 10388963.45 | 5429628.64  | 1.28                    | 0.66   | 0.097 | 0.053  |
| gi334183935 | dehydrin ERD14                                                            | 7.03  | 3  | 12.57  | 730208.39   | 164264.57   | 378435.34   | 0.22                    | 0.52   | 0.035 | 0.058  |
| gi15232626  | beta-glucosidase 23                                                       | 14.69 | 13 | 105.67 | 7464398.90  | 19013285.63 | 5980946.45  | 2.55                    | 0.80   | 0.008 | 0.070  |
| gi79327392  | peroxisomal NAD-malate dehydrogenase 2                                    | 3.95  | 4  | 103.97 | 11969792.64 | 9599227.40  | 16061351.34 | 0.66                    | 1.34   | 0.031 | 0.085  |
| gi334186086 | ketol-acid reductoisomerase                                               | 27.03 | 17 | 23.26  | 1227147.94  | 3621264.18  | 2036112.73  | 2.95                    | 1.66   | 0.003 | 0.122  |
| gi334186238 | Mog1/PsbP/DUF1795-like photosystem II reaction center PsbP family protein | 4.91  | 2  | 14.21  | 1347917.29  | 289130.91   | 610818.85   | 0.21                    | 0.45   | 0.050 | 0.137  |
| gi79325271  | fructose-bisphosphate aldolase 5                                          | 25.17 | 3  | 101.57 | 12439885.88 | 6433657.19  | 16000008.98 | 0.52                    | 1.29   | 0.001 | 0.184  |
| gi42565672  | protein plastid transcriptionally active 16                               | 31.84 | 18 | 78.95  | 6826913.64  | 5112829.33  | 5328989.85  | 0.66                    | 0.78   | 0.035 | 0.210  |
| gi334182565 | salt tolerance-related protein                                            | 18.63 | 11 | 43.01  | 12896727.52 | 7426301.93  | 9497316.55  | 0.58                    | 0.74   | 0.029 | 0.227  |
| gi145334507 | 5-methyltetrahydropteroyltriglutamate--homocysteine methyltransferase     | 25.81 | 9  | 285.83 | 27889762.70 | 40686866.93 | 23371175.75 | 1.50                    | 0.84   | 0.026 | 0.258  |
| gi15217555  | glyceraldehyde-3-phosphate dehydrogenase B                                | 31.24 | 46 | 340.25 | 50628432.48 | 37530141.97 | 43822030.20 | 0.66                    | 0.87   | 0.002 | 0.286  |
| gi15242028  | germin-like protein subfamily 3 member 3                                  | 47.65 | 50 | 57.79  | 9455857.95  | 6684537.10  | 11816491.98 | 0.66                    | 1.25   | 0.021 | 0.305  |
| gi15231805  | epithiospecifier modifier 1                                               | 7.65  | 5  | 34.31  | 3651106.425 | 1111352.035 | 3345424.546 | 0.30                    | 0.91   | 0.03  | 0.78   |
| gi15234136  | 50S ribosomal protein L5                                                  | 10.31 | 5  | 52.82  | 2743302.09  | 717615.93   | 2248307.48  | 0.26                    | 0.82   | 0.001 | 0.564  |
| gi15237593  | photosystem I reaction center subunit N                                   | 22.81 | 9  | 81.26  | 10513483.92 | 7633678.30  | 9283239.98  | 0.66                    | 0.88   | 0.000 | 0.566  |
| gi30678347  | carbonic anhydrase 1                                                      | 52.59 | 42 | 265.87 | 41385244.68 | 30783020.27 | 45824341.17 | 0.66                    | 1.11   | 0.029 | 0.570  |
| gi30690396  | Peroxidase family protein                                                 | 7.1   | 3  | 13.8   | 471022.25   | 893673.94   | 524371.27   | 1.90                    | 1.11   | 0.034 | 0.622  |
| gi15232123  | peptidyl-prolyl cis-trans isomerase CYP38                                 | 13.5  | 6  | 61.35  | 2219547.38  | 1106414.69  | 2645436.31  | 0.50                    | 1.19   | 0.019 | 0.708  |
| gi15222929  | V-type proton ATPase subunit B1                                           | 21.4  | 14 | 96.4   | 6520949.41  | 8049057.24  | 6213597.77  | 1.50                    | 0.95   | 0.008 | 0.738  |
| gi42573371  | carbonic anhydrase 2                                                      | 47.1  | 38 | 238.54 | 37905917.75 | 22108355.35 | 39647420.40 | 0.58                    | 1.05   | 0.017 | 0.778  |
| gi15230922  | dihydrolipoamide S-acetyltransferase                                      | 10    | 6  | 28.81  | 1997795.85  | 533972.92   | 1896046.64  | 0.27                    | 0.95   | 0.040 | 0.826  |
| gi15219721  | malate dehydrogenase                                                      | 14.46 | 14 | 108.7  | 14045684.04 | 21985576.80 | 13733268.12 | 1.57                    | 0.98   | 0.016 | 0.884  |
| gi15220854  | alkenal/one oxidoreductase                                                | 23.58 | 10 | 72.58  | 5527126.12  | 2881873.56  | 5532446.97  | 0.52                    | 1.00   | 0.007 | 0.995  |
| gi30687411  | Dihydrolipoamide succinyltransferase                                      | 6.58  | 1  | 28.43  | 0           | 464466.70   | 0           | <i>fra2</i><br>unique   | n.a.   | n.a.  | n.a.   |
| gi30681437  | SMAD/FHA domain-containing protein                                        | 6.7   | 5  | 37.62  | 0           | 0           | 7871772.71  | <i>ktm1-2</i><br>unique | n.a.   | n.a.  | n.a.   |
| gi15219623  | beta-glucosidase 22                                                       | 3.63  | 3  | 44.19  | 1885333.25  | 4339221.91  | n.e.v.      | 2.30                    | n.e.v. | 0.010 | n.e.v. |
| gi15242516  | actin 7                                                                   | 16.45 | 5  | 46.24  | 2167456.23  | 4527353.81  | n.e.v.      | 2.09                    | n.e.v. | 0.020 | n.e.v. |
| gi79326500  | putative cinnamyl alcohol dehydrogenase 9                                 | 15.76 | 4  | 22.94  | 244304.39   | 721482.69   | n.e.v.      | 2.95                    | n.e.v. | 0.046 | n.e.v. |

|             |                                                        |       |    |        |             |             |             |                       |        |        |        |
|-------------|--------------------------------------------------------|-------|----|--------|-------------|-------------|-------------|-----------------------|--------|--------|--------|
| gi334187997 | uncharacterized protein                                | 5.58  | 1  | 44.1   | 739698.22   | 0           | 0           | Col0<br>unique        | n.a.   | n.a.   | n.a.   |
| gi15236386  | selenium-binding protein 2                             | 3.29  | 1  | 9.5    | 1289730.38  | 0           | 0           | Col0<br>unique        | n.a.   | n.a.   | n.a.   |
| gi30689934  | adenine phosphoribosyl transferase 1                   | 21.86 | 2  | 14.32  | 0           | 846412.85   | 0           | <i>fra2</i><br>unique | n.a.   | n.a.   | n.a.   |
| gi42569601  | Calcium-binding EF-hand family protein                 | 4.42  | 1  | 24.71  | 0           | 1090114.84  | 0           | <i>fra2</i><br>unique | n.a.   | n.a.   | n.a.   |
| gi145323784 | L-ascorbate peroxidase 1                               | 45.78 | 16 | 105.28 | 8389649.71  | 9816665.12  | 2402686.50  | 1.17                  | 0.29   | 0.68   | 0.07   |
| gi145323868 | Pentapeptide repeat-containing protein                 | 7.77  | 1  | 13.01  | 625649.34   | 1048222.92  | 150160.10   | 1.68                  | 0.24   | 0.36   | 0.10   |
| gi145323950 | dehydroascorbate reductase                             | 15.09 | 3  | 12.6   | 1900755.29  | 1832340.86  | 2340819.09  | 0.96                  | 1.23   | 0.95   | 0.44   |
| gi145327197 | putative delta-aminolevulinic acid<br>dehydratase      | 3.49  | 1  | 15.31  | 536170.17   | 589583.21   | 429183.59   | 1.10                  | 0.80   | 0.58   | 0.42   |
| gi145328732 | cyclophilin ROC3                                       | 21.85 | 3  | 29.79  | 8484373.88  | 7098976.29  | 4088843.82  | 0.84                  | 0.48   | 0.54   | 0.06   |
| gi145329204 | triosephosphate isomerase                              | 25.16 | 10 | 65.48  | 5297393.67  | 8483975.07  | 8401121.91  | 1.60                  | 1.59   | 0.28   | 0.17   |
| gi145331980 | 60S ribosomal protein L22-2                            | 9.68  | 2  | 11.55  | 1141072.21  | 717630.13   | 1823848.78  | 0.63                  | 1.60   | 0.51   | 0.20   |
| gi145332383 | translational initiation factor 4A-1                   | 10.95 | 5  | 25.34  | 2429443.12  | 2537153.02  | 2998051.76  | 1.04                  | 1.23   | 0.58   | 0.16   |
| gi145332737 | nitrilase 1                                            | 10.69 | 5  | 26.46  | 1370521.76  | 1197717.62  | n.e.v.      | 0.87                  | n.e.v. | 0.68   | n.e.v. |
| gi145332989 | RNA recognition motif-containing protein               | 7.38  | 1  | 8.7    | 261250.25   | n.e.v.      | 230520.32   | n.e.v.                | 0.88   | n.e.v. | 0.78   |
| gi145333041 | glycine-rich RNA-binding protein 2                     | 12.4  | 3  | 12     | 2823629.34  | n.e.v.      | 1455543.25  | n.e.v.                | 0.52   | n.e.v. | 0.06   |
| gi145333043 | adenosylhomocysteinase                                 | 16    | 3  | 35.39  | 1662490.41  | n.e.v.      | 2473463.22  | n.e.v.                | 1.49   | n.e.v. | 0.67   |
| gi145334189 | 40S ribosomal protein S6-1                             | 9.04  | 1  | 21.56  | 384882.59   | 659162.48   | n.e.v.      | 1.71                  | n.e.v. | 0.40   | n.e.v. |
| gi145334587 | glutamine synthetase                                   | 43.02 | 48 | 379.52 | 35802464.65 | n.e.v.      | 25929217.12 | n.e.v.                | 0.72   | n.e.v. | 0.08   |
| gi145334919 | ferredoxin-NADP(+)-oxidoreductase 1                    | 46.95 | 14 | 109.63 | 7933062.86  | n.e.v.      | 12329565.36 | n.e.v.                | 1.55   | n.e.v. | 0.08   |
| gi15217431  | 26S proteasome AAA-ATPase subunit<br>RPT5B             | 3.78  | 1  | 14.77  | 815272.83   | n.e.v.      | 445719.22   | n.e.v.                | 0.55   | n.e.v. | 0.32   |
| gi15217485  | chloroplast stem-loop binding protein                  | 32.28 | 21 | 165.55 | 19993629.01 | n.e.v.      | 20152294.47 | n.e.v.                | 1.01   | n.e.v. | 0.96   |
| gi15217549  | Gen5-interacting protein EML                           | 9.04  | 2  | 11.56  | 207301.17   | n.e.v.      | 116590.34   | n.e.v.                | 0.56   | n.e.v. | 0.36   |
| gi15218311  | glutathione S-transferase TAU 20                       | 5.53  | 3  | 12.89  | 2185367.28  | n.e.v.      | 2015546.58  | n.e.v.                | 0.92   | n.e.v. | 0.46   |
| gi15218330  | light harvesting complex photosystem II<br>subunit 6   | 13.18 | 4  | 25.1   | 1383594.56  | n.e.v.      | 1221279.37  | n.e.v.                | 0.88   | n.e.v. | 0.86   |
| gi15218869  | isocitrate dehydrogenase                               | 30.49 | 27 | 155.41 | 14418450.87 | 16088600.48 | n.e.v.      | 1.12                  | n.e.v. | 0.44   | n.e.v. |
| gi15219078  | histone H2A protein 9                                  | 21.64 | 1  | 7.51   | 97092.31    | 923912.82   | n.e.v.      | 9.52                  | n.e.v. | 0.25   | n.e.v. |
| gi15219206  | glyceraldehyde 3-phosphate dehydrogenase               | 5.48  | 3  | 31.17  | 2163260.99  | n.e.v.      | 1717005.67  | n.e.v.                | 0.79   | n.e.v. | 0.23   |
| gi15219413  | nascent polypeptide-associated complex<br>subunit beta | 12.73 | 1  | 14.22  | 449671.55   | 328703.78   | n.e.v.      | 0.73                  | n.e.v. | 0.23   | n.e.v. |



|            |                                                        |       |    |        |             |             |             |        |        |        |        |
|------------|--------------------------------------------------------|-------|----|--------|-------------|-------------|-------------|--------|--------|--------|--------|
| gi15219822 | ADP-ribosylation factor GTPase-activating protein AGD2 | 2.19  | 1  | 18.04  | 995788.74   | n.e.v.      | 575033.96   | n.e.v. | 0.58   | n.e.v. | 0.18   |
| gi15219826 | ribulose biphosphate carboxylase small chain 1A        | 40.56 | 63 | 494.97 | 75189685.77 | n.e.v.      | 71141164.50 | n.e.v. | 0.95   | n.e.v. | 0.72   |
| gi15220003 | 30S ribosomal protein S17                              | 13.42 | 3  | 13.28  | 1452732.86  | n.e.v.      | 1427263.44  | n.e.v. | 0.98   | n.e.v. | 0.98   |
| gi15220382 | putative plastid developmental protein DAG             | 16.81 | 2  | 25.84  | 1369796.64  | n.e.v.      | 369990.79   | n.e.v. | 0.27   | n.e.v. | 0.01   |
| gi15220770 | 1-aminocyclopropane-1-carboxylate oxidase 2            | 6.25  | 5  | 34.45  | 776171.93   | n.e.v.      | 439977.22   | n.e.v. | 0.57   | n.e.v. | 0.31   |
| gi15220941 | WD-40 repeat ArcA-like protein                         | 3.36  | 1  | 15.91  | 702498.72   | 1014588.21  | n.e.v.      | 1.44   | n.e.v. | 0.59   | n.e.v. |
| gi15221102 | phosphoribulokinase/uridine kinase-like protein        | 2.02  | 4  | 59.1   | 2248649.95  | n.e.v.      | 1304434.79  | n.e.v. | 0.58   | n.e.v. | 0.44   |
| gi15221187 | glycine-rich RNA-binding protein 5                     | 5.54  | 3  | 10.24  | 1413457.55  | n.e.v.      | 503907.12   | n.e.v. | 0.36   | n.e.v. | 0.16   |
| gi15221198 | glutamine synthetase cytosolic isozyme 1-5             | 4.53  | 5  | 24     | 2225225.16  | 2595701.15  | n.e.v.      | 1.17   | n.e.v. | 0.34   | n.e.v. |
| gi15221261 | geranylgeranyl diphosphate reductase                   | 2.78  | 2  | 28.61  | 2086826.00  | n.e.v.      | 955857.29   | n.e.v. | 0.46   | n.e.v. | 0.33   |
| gi15221851 | acyl carrier protein 2                                 | 15.44 | 6  | 28.05  | 1213546.13  | 1126512.90  | 811139.33   | 0.93   | 0.67   | 0.87   | 0.54   |
| gi15222660 | phosphoribulokinase/uridine kinase-like protein        | 1.93  | 2  | 41.41  | 824530.40   | n.e.v.      | 1009471.83  | n.e.v. | 1.22   | n.e.v. | 0.69   |
| gi15222848 | glyceraldehyde 3-phosphate dehydrogenase               | 57.1  | 47 | 332.02 | 41606970.22 | 64780118.13 | 53247393.36 | 1.56   | 1.28   | 0.07   | 0.11   |
| gi15222954 | thioredoxin-like protein CDSP32                        | 4.64  | 3  | 30.12  | 1527492.72  | 1120619.24  | 2216975.68  | 0.73   | 1.45   | 0.57   | 0.31   |
| gi15222956 | plastocyanin 1                                         | 14.04 | 2  | 13     | 2407268.80  | 1497555.65  | 1921567.96  | 0.62   | 0.80   | 0.06   | 0.16   |
| gi15223217 | probable glycine cleavage system H protein 2           | 21.69 | 12 | 77.4   | 12506580.42 | 8157287.82  | 9796585.81  | 0.65   | 0.78   | 0.02   | 0.04   |
| gi15223294 | pyruvate dehydrogenase E1 component subunit alpha      | 4.67  | 3  | 22.16  | 681937.79   | 821464.54   | n.e.v.      | 1.20   | n.e.v. | 0.13   | n.e.v. |
| gi15223354 | plastid ribosomal protein l11                          | 13.06 | 5  | 24.51  | 3817828.25  | 2267850.40  | 1052464.48  | 0.59   | 0.28   | 0.34   | 0.13   |
| gi15223975 | protein disulfide-isomerase 2                          | 2.95  | 1  | 14.92  | 1115419.82  | 745653.15   | n.e.v.      | 0.67   | n.e.v. | 0.58   | n.e.v. |
| gi15224205 | 50S ribosomal protein L3-1                             | 17.34 | 4  | 43.48  | 3943068.57  | 2270580.88  | 2375984.51  | 0.58   | 0.60   | 0.14   | 0.27   |
| gi15224451 | plastid-specific ribosomal protein 4                   | 10.17 | 2  | 10.29  | 892279.30   | n.e.v.      | 321391.70   | n.e.v. | 0.36   | n.e.v. | 0.13   |
| gi15224581 | glutathione S-transferase PHI 9                        | 22.79 | 3  | 38.08  | 594687.51   | n.e.v.      | 7794161.45  | n.e.v. | 13.11  | n.e.v. | 0.21   |
| gi15224582 | glutathione S-transferase PHI 10                       | 20    | 4  | 35.85  | 4208634.26  | 3850078.10  | 4268153.15  | 0.91   | 1.01   | 0.79   | 0.95   |
| gi15225333 | monothiol glutaredoxin-S12                             | 15.08 | 2  | 17.22  | 582982.83   | 609717.64   | 734198.28   | 1.05   | 1.26   | 0.90   | 0.51   |
| gi15225798 | 3-ketoacyl-CoA thiolase 2                              | 8.66  | 3  | 27.13  | 1630031.73  | 2063097.55  | 2807386.89  | 1.27   | 1.72   | 0.39   | 0.18   |
| gi15226185 | fructose-bisphosphate aldolase 3                       | 7.16  | 1  | 27.56  | 537573.36   | 1905572.37  | n.e.v.      | 3.54   | n.e.v. | 0.08   | n.e.v. |
| gi15226231 | 60S acidic ribosomal protein P2-1                      | 25.22 | 3  | 32.64  | 2798711.94  | 3949916.26  | 584232.94   | 1.41   | 0.21   | 0.58   | 0.19   |
| gi15226314 | chaperonin-60 alpha                                    | 34.13 | 60 | 404.16 | 30046199.13 | 30819695.46 | 23607334.36 | 1.03   | 0.79   | 0.86   | 0.24   |
| gi15226690 | Uroporphyrinogen decarboxylase                         | 7.11  | 3  | 27.16  | 839792.59   | 746377.07   | 481519.92   | 0.89   | 0.57   | 0.82   | 0.15   |

|            |                                                               |       |    |        |             |             |             |        |        |        |        |
|------------|---------------------------------------------------------------|-------|----|--------|-------------|-------------|-------------|--------|--------|--------|--------|
| gi15226998 | outer plastid envelope protein 16-1                           | 18.92 | 4  | 23.73  | 826961.01   | 599014.18   | 1102991.17  | 0.72   | 1.33   | 0.36   | 0.23   |
| gi15227257 | ATP synthase subunit gamma                                    | 4.62  | 1  | 11.28  | 1420663.46  | 1094676.92  | 1485627.01  | 0.77   | 1.05   | 0.36   | 0.85   |
| gi15227428 | putative plastid-lipid-associated protein 3                   | 12.5  | 4  | 20.64  | 1774576.82  | 1488160.50  | 2315577.01  | 0.84   | 1.30   | 0.66   | 0.56   |
| gi15227623 | pentatricopeptide repeat-containing protein                   | 3.63  | 1  | 22.22  | 1524409.77  | 703436.01   | n.e.v.      | 0.46   | n.e.v. | 0.41   | n.e.v. |
| gi15227987 | bifunctional enolase 2/transcriptional activator              | 26.58 | 20 | 124.31 | 20587853.33 | 23967917.01 | 17984998.25 | 1.16   | 0.87   | 0.29   | 0.38   |
| gi15228098 | ribosomal protein L11 family protein                          | 16.87 | 4  | 35.71  | 3353509.37  | 4542193.76  | n.e.v.      | 1.35   | n.e.v. | 0.45   | n.e.v. |
| gi15228102 | chloroplast RNA binding protein                               | 33.22 | 17 | 99.76  | 9859968.76  | 9410031.25  | 9772550.28  | 0.95   | 0.99   | 0.86   | 0.97   |
| gi15228229 | legume lectin-like protein                                    | 20.65 | 8  | 53.69  | 6504801.68  | 1446267.22  | n.e.v.      | 0.22   | n.e.v. | 0.14   | n.e.v. |
| gi15228276 | translationally-controlled tumor protein-like protein         | 26.79 | 9  | 55.47  | 7786016.48  | 7504242.16  | 6765961.74  | 0.96   | 0.87   | 0.89   | 0.49   |
| gi15228752 | calvin cycle protein CP12-2                                   | 25.19 | 1  | 12.4   | 923272.94   | 1805031.88  | 1565473.18  | 1.96   | 1.70   | 0.14   | 0.36   |
| gi15228869 | copper chaperone                                              | 11.57 | 3  | 20.54  | 2287006.35  | 2442265.80  | 3383232.86  | 1.07   | 1.48   | 0.87   | 0.39   |
| gi15228889 | ATP sulfurylase 1                                             | 4.75  | 4  | 25.49  | 2026411.44  | 1486967.13  | 1519748.70  | 0.73   | 0.75   | 0.13   | 0.14   |
| gi15229018 | glutamate-1-semialdehyde 2,1-aminomutase 2                    | 21.61 | 10 | 68.11  | 8159722.39  | 6401101.75  | 7340691.94  | 0.78   | 0.90   | 0.52   | 0.63   |
| gi15229033 | S-adenosylmethionine synthase 4                               | 9.67  | 5  | 57.1   | 6888719.74  | 5431510.63  | 5215082.74  | 0.79   | 0.76   | 0.65   | 0.61   |
| gi15229084 | peroxidase 33                                                 | 7.06  | 1  | 7.29   | 178535.65   | 509696.11   | n.e.v.      | 2.85   | n.e.v. | 0.08   | n.e.v. |
| gi15229095 | peroxidase 34                                                 | 7.08  | 3  | 14.22  | 786140.95   | 964035.01   | 267921.06   | 1.23   | 0.34   | 0.58   | 0.22   |
| gi15229231 | glyceraldehyde-3-phosphate dehydrogenase C subunit 1          | 57.1  | 55 | 314.73 | 44071052.00 | n.e.v.      | 6308583.89  | n.e.v. | 0.14   | n.e.v. | 0.18   |
| gi15229384 | chloroplast stem-loop binding protein-41                      | 3.2   | 1  | 31.8   | 912066.98   | 958608.00   | 2205603.64  | 1.05   | 2.42   | 0.94   | 0.41   |
| gi15229443 | 50S ribosomal protein L1                                      | 9.83  | 9  | 61.22  | 5665634.60  | 3798146.40  | 3761491.98  | 0.67   | 0.66   | 0.13   | 0.28   |
| gi15229559 | heat shock protein 60                                         | 2.25  | 1  | 69.22  | 1122101.04  | 2346075.15  | 1845352.21  | 2.09   | 1.64   | 0.42   | 0.53   |
| gi15229806 | 2-Cys peroxiredoxin BAS1                                      | 35.71 | 19 | 100.05 | 14183743.56 | 10492212.32 | 10960332.57 | 0.74   | 0.77   | 0.09   | 0.13   |
| gi15229809 | uncharacterized protein                                       | 5.88  | 5  | 17.09  | 3184347.88  | 3321639.58  | 3386126.43  | 1.04   | 1.06   | 0.84   | 0.69   |
| gi15230324 | oxygen-evolving enhancer protein 1-2                          | 46.22 | 44 | 357.9  | 52548331.87 | 64026796.19 | 58479312.51 | 1.22   | 1.11   | 0.25   | 0.60   |
| gi15230358 | adenylosuccinate synthetase                                   | 3.88  | 1  | 13.24  | 745924.57   | n.e.v.      | 450550.46   | n.e.v. | 0.60   | n.e.v. | 0.57   |
| gi15231200 | chloroplast RNA-binding protein 33                            | 8.81  | 4  | 32.43  | 2167758.52  | 1982975.82  | 570755.20   | 0.91   | 0.26   | 0.86   | 0.06   |
| gi15231255 | TCP-1/cpn60 chaperonin family protein                         | 38.26 | 52 | 310.3  | 36960876.00 | 39805152.40 | 27147995.90 | 1.08   | 0.73   | 0.58   | 0.14   |
| gi15232074 | voltage dependent anion channel 1                             | 11.23 | 3  | 19.21  | 2436702.86  | 2386435.22  | 1206865.43  | 0.98   | 0.50   | 0.97   | 0.15   |
| gi15232313 | mitochondrial transcription termination factor family protein | 3.41  | 2  | 41.12  | 1314689.13  | 664480.74   | 720255.96   | 0.51   | 0.55   | 0.08   | 0.20   |
| gi15232503 | aspartyl protease family protein                              | 3.76  | 2  | 21.13  | 1517707.97  | 603808.01   | 1970272.17  | 0.40   | 1.30   | 0.24   | 0.56   |
| gi15232567 | thioredoxin M4                                                | 10.88 | 5  | 27.84  | 1908579.76  | 1681327.76  | 2962619.72  | 0.88   | 1.55   | 0.78   | 0.51   |

|            |                                                                      |       |    |        |             |             |             |        |        |        |        |
|------------|----------------------------------------------------------------------|-------|----|--------|-------------|-------------|-------------|--------|--------|--------|--------|
| gi15232724 | uncharacterized protein                                              | 34    | 11 | 59.28  | 6377011.35  | 4020306.03  | 4524593.83  | 0.63   | 0.71   | 0.30   | 0.48   |
| gi15232776 | cell division control protein 48-A                                   | 4.94  | 4  | 38.31  | 648488.99   | 923703.46   | n.e.v.      | 1.42   | n.e.v. | 0.45   | n.e.v. |
| gi15233111 | cysteine synthase C1                                                 | 6.79  | 4  | 31.45  | 2286497.23  | 1513919.04  | 1066310.65  | 0.66   | 0.47   | 0.37   | 0.15   |
| gi15233272 | triosephosphate isomerase                                            | 48.43 | 34 | 193.77 | 22725284.41 | 26720416.55 | 20393172.78 | 1.18   | 0.90   | 0.52   | 0.59   |
| gi15233291 | photosystem I subunit H-1                                            | 7.59  | 4  | 52.61  | 4254678.31  | 5524514.19  | 2330351.74  | 1.30   | 0.55   | 0.46   | 0.25   |
| gi15233357 | fibrillin                                                            | 17.61 | 10 | 46.53  | 5298060.34  | 1608786.68  | 5161025.09  | 0.30   | 0.97   | 0.15   | 0.94   |
| gi15233538 | profilin 2                                                           | 9.92  | 1  | 15.12  | 662552.06   | n.e.v.      | 471700.45   | n.e.v. | 0.71   | n.e.v. | 0.56   |
| gi15233587 | oxygen evolving complex of photosystem II subunit PsbQ               | 32.29 | 23 | 188.34 | 41468643.49 | 36764085.21 | 35378584.63 | 0.89   | 0.85   | 0.64   | 0.50   |
| gi15233740 | HSP90-like protein GRP94                                             | 1.58  | 1  | 23.57  | 640436.27   | 1118889.77  | 530008.41   | 1.75   | 0.83   | 0.14   | 0.66   |
| gi15233779 | chloroplast heat shock protein 70-1                                  | 10.86 | 10 | 118.06 | 13753470.19 | n.e.v.      | 2429839.91  | n.e.v. | 0.18   | n.e.v. | 0.08   |
| gi15233985 | F-type H <sup>+</sup> -transporting ATPase subunit delta             | 20.51 | 10 | 85.74  | 7285028.80  | 5782385.53  | 4223932.48  | 0.79   | 0.58   | 0.37   | 0.24   |
| gi15234781 | peptidyl-prolyl cis-trans isomerase CYP1                             | 15.7  | 1  | 19.06  | 732410.87   | 1646497.84  | 1646497.84  | 2.25   | 2.25   | 0.47   | 0.47   |
| gi15234875 | acyl carrier protein 4                                               | 32.85 | 10 | 45.57  | 6910168.92  | 4601051.96  | 6199524.31  | 0.67   | 0.90   | 0.10   | 0.68   |
| gi15234942 | peptide methionine sulfoxide reductase A4                            | 5.43  | 4  | 31.71  | 1414578.04  | 743974.58   | n.e.v.      | 0.53   | n.e.v. | 0.07   | n.e.v. |
| gi15235282 | D-3-phosphoglycerate dehydrogenase                                   | 6.14  | 4  | 48.04  | 2098063.03  | 3582173.58  | 1960872.74  | 1.71   | 0.93   | 0.19   | 0.61   |
| gi15235431 | V-type proton ATPase subunit F                                       | 13.28 | 1  | 9.04   | 545884.00   | 397091.27   | n.e.v.      | 0.73   | n.e.v. | 0.78   | n.e.v. |
| gi15235575 | plastid-lipid associated protein PAP / fibrillin family protein      | 9.68  | 5  | 28.07  | 3099796.08  | n.e.v.      | 4989601.72  | n.e.v. | 1.61   | n.e.v. | 0.18   |
| gi15236166 | small subunit ribosomal protein 16                                   | 42.48 | 6  | 33.74  | 2036087.11  | 1338713.13  | 464407.86   | 0.66   | 0.23   | 0.30   | 0.16   |
| gi15236211 | rotamase cyclophilin 5                                               | 10.47 | 2  | 50.16  | 4712851.68  | 5349831.26  | 766075.48   | 1.14   | 0.16   | 0.81   | 0.33   |
| gi15236264 | catalase 2                                                           | 23.17 | 14 | 137.29 | 10652982.56 | 8328679.81  | n.e.v.      | 0.78   | n.e.v. | 0.61   | n.e.v. |
| gi15236327 | thioredoxin M2                                                       | 18.28 | 6  | 31.27  | 4493676.20  | 4028145.24  | 3513330.92  | 0.90   | 0.78   | 0.55   | 0.08   |
| gi15236375 | serine hydroxymethyltransferase 4                                    | 6.16  | 7  | 41.22  | 7488640.38  | 5268927.62  | 4276233.32  | 0.70   | 0.57   | 0.48   | 0.24   |
| gi15236566 | polyketide cyclase/dehydrase and lipid transport superfamily protein | 23.84 | 7  | 55.72  | 5946195.44  | 5405847.21  | 4959098.19  | 0.91   | 0.83   | 0.67   | 0.70   |
| gi15237054 | V-type proton ATPase subunit E1                                      | 4.35  | 1  | 11.69  | 1054875.19  | n.e.v.      | 2443269.32  | n.e.v. | 2.32   | n.e.v. | 0.11   |
| gi15237059 | putative elongation factor Tu                                        | 38.45 | 58 | 354.19 | 39366121.42 | 40106532.10 | 38883309.85 | 1.02   | 0.99   | 0.55   | 0.93   |
| gi15237069 | phosphoserine aminotransferase                                       | 7.44  | 3  | 17.1   | 1669656.42  | 1233058.30  | 1398139.33  | 0.74   | 0.84   | 0.57   | 0.66   |
| gi15237084 | putative translation initiation factor IF-1                          | 11.35 | 2  | 7.97   | 1415457.07  | 1061795.59  | 207116.68   | 0.75   | 0.15   | 0.67   | 0.19   |
| gi15237225 | photosystem II stability/assembly factor HCF136                      | 20.6  | 13 | 70.97  | 8037180.05  | 7257591.05  | 7434766.92  | 0.90   | 0.93   | 0.80   | 0.81   |
| gi15237488 | prohibitin 3                                                         | 5.42  | 2  | 13.8   | 2166378.28  | 1225060.79  | n.e.v.      | 0.57   | n.e.v. | 0.48   | n.e.v. |
| gi15237548 | 40S ribosomal protein S28-1                                          | 18.75 | 3  | 11.5   | 2888609.12  | 1996194.52  | 1633673.92  | 0.69   | 0.57   | 0.43   | 0.25   |

|            |                                                               |       |    |        |              |             |             |        |        |        |        |
|------------|---------------------------------------------------------------|-------|----|--------|--------------|-------------|-------------|--------|--------|--------|--------|
| gi15238554 | proteasome alpha subunit A1                                   | 10.98 | 4  | 24.6   | 240176.27    | 195264.51   | n.e.v.      | 0.81   | n.e.v. | 0.58   | n.e.v. |
| gi15239146 | NADP-dependent malic enzyme 2                                 | 3.57  | 1  | 17.68  | 1645515.54   | 2992046.19  | 1900543.40  | 1.82   | 1.15   | 0.40   | 0.84   |
| gi15239282 | ferredoxin-NADP(+)-oxidoreductase 1                           | 36.11 | 18 | 126.34 | 16064927.61  | 13910673.70 | 11760369.91 | 0.87   | 0.73   | 0.61   | 0.35   |
| gi15239602 | light-harvesting chlorophyll B-binding protein 3              | 22.26 | 10 | 66.8   | 5424404.67   | 3860222.64  | 5422017.91  | 0.71   | 1.00   | 0.34   | 1.00   |
| gi15239697 | histone H2A                                                   | 17.69 | 3  | 13.56  | 1720688.01   | 1924711.31  | n.e.v.      | 1.12   | n.e.v. | 0.42   | n.e.v. |
| gi15239735 | thiazole biosynthetic enzyme                                  | 17.48 | 18 | 80.84  | 9570474.80   | 6831340.26  | 9357404.06  | 0.71   | 0.98   | 0.20   | 0.91   |
| gi15239755 | tryptophan synthase beta chain                                | 3.19  | 2  | 12.53  | 722988.44    | 823921.26   | n.e.v.      | 1.14   | n.e.v. | 0.67   | n.e.v. |
| gi15240013 | PS II oxygen-evolving complex 1                               | 50.6  | 48 | 355.28 | 49139499.45  | 63565393.61 | 68494194.30 | 1.29   | 1.39   | 0.22   | 0.17   |
| gi15240578 | heat shock protein 70-2                                       | 14.21 | 20 | 149.02 | 14981509.58  | 11983942.10 | n.e.v.      | 0.80   | n.e.v. | 0.54   | n.e.v. |
| gi15240641 | chloroplast RNA-binding protein 31B                           | 4.84  | 1  | 10.92  | 543601.09    | 699430.78   | n.e.v.      | 1.29   | n.e.v. | 0.09   | n.e.v. |
| gi15240644 | ribosomal protein L10                                         | 19.09 | 3  | 36.67  | 1652218.76   | 1771529.94  | 635999.92   | 1.07   | 0.38   | 0.75   | 0.09   |
| gi15240901 | ribulose biphosphate carboxylase small chain 3B               | 40.88 | 58 | 432.81 | 69865146.94  | 76445170.22 | n.e.v.      | 1.09   | n.e.v. | 0.67   | n.e.v. |
| gi15240903 | ribulose biphosphate carboxylase small chain 2B               | 40.88 | 47 | 382.18 | 106326725.31 | n.e.v.      | 85126451.75 | n.e.v. | 0.80   | n.e.v. | 0.66   |
| gi15240912 | ribulose biphosphate carboxylase small chain 1B               | 37.02 | 48 | 351.28 | 60584998.04  | 57941091.80 | 53444008.13 | 0.96   | 0.88   | 0.75   | 0.38   |
| gi15241005 | chlorophyll a-b binding protein CP29.1                        | 13.1  | 7  | 41.42  | 6287517.06   | 6279226.36  | 8500807.73  | 1.00   | 1.35   | 1.00   | 0.41   |
| gi15241125 | 40S ribosomal protein S24-2                                   | 11.28 | 2  | 12.3   | 434863.67    | n.e.v.      | 186477.15   | n.e.v. | 0.43   | n.e.v. | 0.32   |
| gi15241316 | 40S ribosomal protein S8-1                                    | 27.03 | 8  | 43.53  | 2212564.47   | 1995105.56  | n.e.v.      | 0.90   | n.e.v. | 0.73   | n.e.v. |
| gi15241472 | tubulin beta-4 chain                                          | 5.63  | 5  | 41.15  | 2019649.12   | 3686107.64  | 3268645.66  | 1.83   | 1.62   | 0.53   | 0.39   |
| gi15241492 | formate dehydrogenase                                         | 3.39  | 1  | 23.07  | 1380013.30   | 940917.95   | 3122327.29  | 0.68   | 2.26   | 0.67   | 0.22   |
| gi15241573 | Porphobilinogen deaminase                                     | 18.06 | 6  | 43.16  | 4596332.19   | 3758132.30  | 3665689.92  | 0.82   | 0.80   | 0.60   | 0.59   |
| gi15241849 | heat shock cognate protein 70-1                               | 39.48 | 33 | 310.03 | 36342011.08  | 26093159.11 | 26806051.58 | 0.72   | 0.74   | 0.54   | 0.44   |
| gi15242674 | glutaredoxin-C2                                               | 12.61 | 1  | 10.15  | 217470.89    | 530880.32   | n.e.v.      | 2.44   | n.e.v. | 0.10   | n.e.v. |
| gi15242717 | adenosine kinase 2                                            | 22.9  | 11 | 71.86  | 3106404.00   | 6387782.00  | n.e.v.      | 2.06   | n.e.v. | 0.36   | n.e.v. |
| gi15242753 | adenylate kinase 1                                            | 11.79 | 3  | 21.42  | 1466029.61   | 1154213.27  | 1920562.05  | 0.79   | 1.31   | 0.66   | 0.26   |
| gi18379115 | photosystem II Psb27 protein                                  | 27.59 | 7  | 41.65  | 6010595.56   | 6330353.64  | 6088861.60  | 1.05   | 1.01   | 0.86   | 0.96   |
| gi18391062 | aspartyl protease-like protein                                | 4.23  | 2  | 25.92  | 1579427.85   | 1511715.40  | 1251818.99  | 0.96   | 0.79   | 0.92   | 0.52   |
| gi18391066 | 2,3-bisphosphoglycerate-independent phosphoglycerate mutase 1 | 7     | 2  | 12.83  | 696281.61    | 1626194.99  | 846459.45   | 2.34   | 1.22   | 0.11   | 0.68   |
| gi18394322 | uncharacterized protein                                       | 4.15  | 1  | 15.84  | 429544.95    | 535812.40   | n.e.v.      | 1.25   | n.e.v. | 0.61   | n.e.v. |
| gi18394414 | ACT domain-containing protein                                 | 16.9  | 7  | 66.88  | 3972682.53   | 2987153.68  | 2707535.06  | 0.75   | 0.68   | 0.57   | 0.52   |
| gi18398333 | NAD(P)-binding Rossmann-fold-containing                       | 9.12  | 2  | 17.06  | 195958.28    | 362056.87   | 1633285.92  | 1.85   | 8.33   | 0.07   | 0.19   |

| protein     |                                                                |       |     |        |              |              |              |        |        |        |        |
|-------------|----------------------------------------------------------------|-------|-----|--------|--------------|--------------|--------------|--------|--------|--------|--------|
| gi18398761  | 60S ribosomal protein L9-1                                     | 34.02 | 8   | 61.75  | 7776894.13   | 5124939.74   | 2757375.51   | 0.66   | 0.35   | 0.20   | 0.07   |
| gi18399100  | 40S ribosomal protein S18                                      | 13.16 | 1   | 19.12  | 891858.91    | 2159337.15   | 1384238.47   | 2.42   | 1.55   | 0.08   | 0.43   |
| gi18401614  | cysteine proteinase RD21a                                      | 3.46  | 3   | 21.07  | 2526781.30   | 2223812.94   | n.e.v.       | 0.88   | n.e.v. | 0.71   | n.e.v. |
| gi18402859  | photosystem II subunit T                                       | 11.65 | 1   | 5.19   | 694480.45    | n.e.v.       | 526638.38    | n.e.v. | 0.76   | n.e.v. | 0.57   |
| gi18403751  | FIBRILLIN 4                                                    | 17.96 | 6   | 41.85  | 2963167.71   | 2897005.18   | 3003547.50   | 0.98   | 1.01   | 0.95   | 0.90   |
| gi18404382  | malate dehydrogenase 1                                         | 34.6  | 26  | 139.06 | 27560311.53  | 21037857.94  | 19679066.19  | 0.76   | 0.71   | 0.31   | 0.30   |
| gi18405008  | acyl carrier protein 3                                         | 15.44 | 7   | 36.63  | 1361922.46   | 1998625.13   | 1022143.96   | 1.47   | 0.75   | 0.19   | 0.51   |
| gi18405061  | thylakoid lumen protein 18.3                                   | 5.96  | 2   | 29.07  | 1352259.16   | 1183735.47   | 2976729.86   | 0.88   | 2.20   | 0.67   | 0.31   |
| gi18405145  | ribulose biphosphate carboxylase/oxygenase activase            | 66.24 | 141 | 839.69 | 140657575.13 | 129685181.23 | 175178313.90 | 0.92   | 1.25   | 0.44   | 0.37   |
| gi18405391  | ZKT protein containing PDZ, K-box and a TPR region             | 9.55  | 6   | 38.29  | 5078877.89   | 4868790.97   | 4190408.64   | 0.96   | 0.83   | 0.88   | 0.49   |
| gi18407594  | vacuolar calcium-binding protein-like protein                  | 11.18 | 5   | 19.79  | 3423729.59   | 2207189.44   | 1552592.30   | 0.64   | 0.45   | 0.35   | 0.14   |
| gi18408627  | Haloacid dehalogenase-like hydrolase (HAD) superfamily protein | 3.45  | 1   | 21.18  | 521299.88    | n.e.v.       | 1928968.30   | n.e.v. | 3.70   | n.e.v. | 0.33   |
| gi18410104  | tryptophan synthase alpha chain                                | 4.17  | 1   | 10.49  | 582825.05    | 1182229.65   | n.e.v.       | 2.03   | n.e.v. | 0.09   | n.e.v. |
| gi18410661  | alpha/beta-Hydrolases superfamily protein                      | 2.97  | 2   | 41.34  | 3093476.49   | 1948938.14   | 947940.74    | 0.63   | 0.31   | 0.15   | 0.14   |
| gi18411523  | thylakoid rhodanese-like protein                               | 5.58  | 4   | 34.91  | 2727404.34   | 2057499.30   | 2228359.91   | 0.75   | 0.82   | 0.38   | 0.58   |
| gi18411929  | glutathione S-transferase TAU 19                               | 5.48  | 3   | 21.72  | 1684971.34   | 1858317.21   | 2078616.33   | 1.10   | 1.23   | 0.54   | 0.21   |
| gi18412406  | E-Z type HEAT repeat-containing protein                        | 5.88  | 3   | 13.29  | 605494.14    | 733487.78    | n.e.v.       | 1.21   | n.e.v. | 0.03   | 0.14   |
| gi18412657  | ribosome-recycling factor                                      | 14.18 | 5   | 31.22  | 2548345.18   | 4106636.93   | n.e.v.       | 1.61   | n.e.v. | 0.30   | n.e.v. |
| gi18413214  | nucleoside diphosphate kinase 1                                | 41.42 | 11  | 75.35  | 5423175.11   | 4379196.93   | 3611846.16   | 0.81   | 0.67   | 0.33   | 0.12   |
| gi18415378  | proline-rich family protein                                    | 13.62 | 7   | 32.43  | 3170309.41   | 1873481.84   | 3517759.84   | 0.59   | 1.11   | 0.15   | 0.77   |
| gi18415911  | ATP synthase subunit beta-2                                    | 30.22 | 38  | 283.85 | 52082926.64  | 80457398.67  | 23312214.05  | 1.54   | 0.45   | 0.38   | 0.12   |
| gi18415982  | tetratricopeptide repeat protein                               | 3.4   | 2   | 13.74  | 1808018.74   | 1690772.40   | 1346363.81   | 0.94   | 0.74   | 0.90   | 0.56   |
| gi18416264  | histone H3                                                     | 23.53 | 2   | 15.76  | 288889.94    | 245923.23    | n.e.v.       | 0.85   | n.e.v. | 0.82   | n.e.v. |
| gi18417512  | heavy metal transport/detoxification domain-containing protein | 27.53 | 6   | 40.17  | 4333986.17   | 3924513.46   | 3338151.60   | 0.91   | 0.77   | 0.72   | 0.37   |
| gi18418410  | embryo defective 1241                                          | 11.11 | 2   | 21.19  | 1078930.79   | 817225.39    | 1126690.63   | 0.76   | 1.04   | 0.65   | 0.96   |
| gi18420348  | fructose-bisphosphate aldolase 2                               | 39.95 | 44  | 278.29 | 43505101.82  | 56121757.85  | 41622980.56  | 1.29   | 0.96   | 0.17   | 0.46   |
| gi18420800  | putative 30S ribosomal protein                                 | 5.19  | 1   | 13.56  | 1201030.05   | n.e.v.       | 576090.89    | n.e.v. | 0.48   | n.e.v. | 0.26   |
| gi18422918  | lactoylglutathione lyase / glyoxalase I-like protein           | 8.43  | 1   | 18.6   | 1017430.10   | 949666.79    | n.e.v.       | 0.93   | n.e.v. | 0.87   | n.e.v. |
| gi186478207 | photosystem II subunit P-1                                     | 55.25 | 31  | 223.87 | 32365290.11  | 23419089.58  | 28133387.10  | 0.72   | 0.87   | 0.03   | 0.48   |

|             |                                                               |       |    |        |             |             |             |        |        |        |        |
|-------------|---------------------------------------------------------------|-------|----|--------|-------------|-------------|-------------|--------|--------|--------|--------|
| gi186491325 | phosphoglycerate kinase                                       | 50.12 | 60 | 373.13 | 45940184.09 | 34815640.49 | 29639272.07 | 0.76   | 0.65   | 0.20   | 0.16   |
| gi186509731 | methionine synthase 2                                         | 21.57 | 26 | 163.37 | 15729796.76 | n.e.v.      | 12521697.93 | n.e.v. | 0.80   | n.e.v. | 0.17   |
| gi186515763 | glycine dehydrogenase [decarboxylating] 2                     | 8.2   | 14 | 137.35 | 5756764.64  | 8096644.36  | 4890798.61  | 1.41   | 0.85   | 0.08   | 0.16   |
| gi186521400 | ATP synthase subunit beta-1                                   | 33.27 | 41 | 316.64 | 34909557.41 | 29223552.21 | 23032318.08 | 0.84   | 0.66   | 0.66   | 0.36   |
| gi186524998 | Succinyl-CoA ligase [GDP-forming] subunit alpha-2             | 9.76  | 3  | 13.9   | 571861.97   | 630863.51   | 554793.16   | 1.10   | 0.97   | 0.69   | 0.94   |
| gi186526990 | 2-phosphoglycolate phosphatase 1                              | 11.75 | 4  | 38.8   | 3292871.33  | 1849367.98  | 2122528.65  | 0.56   | 0.64   | 0.23   | 0.41   |
| gi22327852  | trigger factor type chaperone family protein                  | 2.19  | 2  | 38.31  | 1230435.89  | 845906.86   | 353925.56   | 0.69   | 0.29   | 0.65   | 0.15   |
| gi22328910  | argininosuccinate synthase                                    | 8.5   | 4  | 30.45  | 1118964.18  | 1253970.64  | n.e.v.      | 1.12   | n.e.v. | 0.31   | n.e.v. |
| gi22331102  | lectin-like protein                                           | 7.01  | 1  | 14.15  | 1070070.24  | 3105707.74  | 544425.44   | 2.90   | 0.51   | 0.10   | 0.27   |
| gi238479568 | thiocyanate methyltransferase 1                               | 8.59  | 1  | 6.33   | 535858.21   | 528403.11   | 749635.18   | 0.99   | 1.40   | 0.96   | 0.46   |
| gi238479752 | ribosomal protein S5/Elongation factor G/III/V family protein | 9.15  | 12 | 82.38  | 5546768.62  | 6448165.69  | n.e.v.      | 1.16   | n.e.v. | 0.09   | n.e.v. |
| gi238480186 | HSP20-like chaperone                                          | 5.83  | 3  | 21.96  | 2574690.11  | 1842353.08  | 1489732.49  | 0.72   | 0.58   | 0.25   | 0.19   |
| gi30678090  | Chaperone protein htpG family protein                         | 15.19 | 12 | 88.92  | 5783297.66  | 3688398.94  | 5624539.26  | 0.64   | 0.97   | 0.12   | 0.86   |
| gi30678219  | aconitate hydratase 3                                         | 3.13  | 5  | 22.06  | 1533836.46  | 381846.34   | 0.00        | 0.25   | 0.00   | 0.42   | 0.06   |
| gi30678634  | thioredoxin M1                                                | 8.94  | 3  | 34.22  | 3140471.26  | 1387651.08  | 1975533.34  | 0.44   | 0.63   | 0.19   | 0.34   |
| gi30678951  | protoporphyrinogen oxidase                                    | 3.56  | 1  | 20.78  | 1165623.30  | n.e.v.      | 530772.55   | n.e.v. | 0.46   | n.e.v. | 0.53   |
| gi30679426  | cytochrome b6-f complex iron-sulfur subunit                   | 27.14 | 10 | 73.48  | 10495171.19 | 6505979.32  | 7777874.09  | 0.62   | 0.74   | 0.07   | 0.25   |
| gi30679979  | Importin subunit alpha-1                                      | 2.63  | 1  | 5.08   | 918124.14   | n.e.v.      | 401164.19   | n.e.v. | 0.44   | n.e.v. | 0.18   |
| gi30680575  | phosphoglycerate mutase, 2,3-bisphosphoglycerate-independent  | 6.96  | 2  | 29.39  | 1992158.45  | 1992198.52  | n.e.v.      | 1.00   | n.e.v. | 1.00   | n.e.v. |
| gi30681554  | mitochondrial F1F0-ATP synthase subunit Fad                   | 8.18  | 3  | 26.84  | 1610886.54  | 1433301.31  | n.e.v.      | 0.89   | n.e.v. | 0.89   | n.e.v. |
| gi30684617  | 40S ribosomal protein S12-1                                   | 9.72  | 3  | 16.78  | 2846509.27  | 3219454.91  | n.e.v.      | 1.13   | n.e.v. | 0.68   | n.e.v. |
| gi30685069  | actin 2                                                       | 9.16  | 4  | 42.33  | 3357618.94  | 3577611.88  | 3576788.97  | 1.07   | 1.07   | 0.91   | 0.90   |
| gi30685117  | protein TIC 62                                                | 2.03  | 3  | 22.25  | 69002.35    | 17514.64    | 152951.80   | 0.25   | 2.22   | 0.08   | 0.54   |
| gi30686293  | UTP--glucose-1-phosphate uridylyltransferase 1                | 4.87  | 5  | 48.59  | 1450948.83  | 1094512.27  | n.e.v.      | 0.75   | n.e.v. | 0.75   | n.e.v. |
| gi30688425  | glyceraldehyde-3-phosphate dehydrogenase A subunit            | 52.78 | 77 | 450.77 | 81242522.66 | 76047925.39 | 73106267.74 | 0.94   | 0.90   | 0.46   | 0.31   |
| gi30690089  | myrosinase 1                                                  | 27.41 | 21 | 124.3  | 13278437.04 | 14841298.57 | 17096281.87 | 1.12   | 1.29   | 0.38   | 0.17   |
| gi30690772  | glutathione S-transferase phi 8                               | 26.62 | 11 | 65.44  | 6788362.06  | 6794127.05  | 5817236.85  | 1.00   | 0.86   | 0.99   | 0.36   |
| gi30691626  | heat shock protein 70-1                                       | 3.37  | 3  | 31.4   | 188265.72   | 272156.51   | n.e.v.      | 1.45   | n.e.v. | 0.20   | n.e.v. |
| gi30692256  | glycine-rich RNA-binding protein 8                            | 10.87 | 2  | 33.66  | 698293.28   | 1353769.66  | 1376822.72  | 1.94   | 1.97   | 0.10   | 0.54   |

|             |                                                                    |       |    |        |              |              |             |        |        |        |        |
|-------------|--------------------------------------------------------------------|-------|----|--------|--------------|--------------|-------------|--------|--------|--------|--------|
| gi30693659  | thioredoxin Y2                                                     | 7.78  | 2  | 13.59  | 519069.96    | 692890.35    | n.e.v.      | 1.33   | n.e.v. | 0.55   | n.e.v. |
| gi30693966  | Luminal-binding protein 2                                          | 14.85 | 16 | 107.5  | 8289467.68   | 11707537.59  | 6164690.76  | 1.41   | 0.74   | 0.10   | 0.07   |
| gi30694221  | dihydrolipoyl dehydrogenase 1                                      | 20.12 | 13 | 123.15 | 6163307.86   | 7945663.52   | 9220652.47  | 1.29   | 1.50   | 0.46   | 0.28   |
| gi30694420  | 40S ribosomal protein S7-1                                         | 13.61 | 2  | 18.22  | 1717103.77   | 897112.50    | 827261.13   | 0.52   | 0.48   | 0.39   | 0.54   |
| gi30694694  | BOI-related protein 1                                              | 5.62  | 2  | 16.69  | 1275732.92   | 899083.91    | 2205322.80  | 0.70   | 1.73   | 0.39   | 0.10   |
| gi30695097  | methylenetetrahydrofolate reductase 1                              | 3.93  | 1  | 9.83   | 447853.00    | 710418.50    | 615742.26   | 1.59   | 1.37   | 0.56   | 0.27   |
| gi30696124  | haloacid dehalogenase-like hydrolase family protein                | 2.65  | 2  | 19.06  | 916173.19    | 463252.72    | n.e.v.      | 0.51   | n.e.v. | 0.38   | n.e.v. |
| gi30696347  | thylakoid luminal protein-17.4                                     | 5.53  | 1  | 29.04  | 625959.03    | 616986.80    | 314020.66   | 0.99   | 0.50   | 0.94   | 0.19   |
| gi30696928  | Monodehydroascorbate reductase                                     | 11.54 | 5  | 48.01  | 3949122.12   | 7913476.29   | 15285436.96 | 2.00   | 3.87   | 0.25   | 0.09   |
| gi30696958  | putative translation initiation factor                             | 2.32  | 2  | 20.5   | 229399.29    | 1014820.51   | 287916.46   | 4.42   | 1.26   | 0.08   | 0.84   |
| gi30697525  | D-ribulose-5-phosphate-3-epimerase                                 | 6.76  | 2  | 14.74  | 2874421.77   | 2398466.43   | 4273742.89  | 0.83   | 1.49   | 0.76   | 0.52   |
| gi334182539 | glyceraldehyde-3-phosphate dehydrogenase (NADP+) (phosphorylating) | 48.29 | 65 | 401.4  | 73142777.61  | 70944483.40  | 63896360.22 | 0.97   | 0.87   | 0.82   | 0.20   |
| gi334183715 | 60S ribosomal protein L17-2                                        | 7.63  | 1  | 16.01  | 641242.56    | 658019.40    | 666168.67   | 1.03   | 1.04   | 0.91   | 0.90   |
| gi334183935 | dehydrin ERD14                                                     | 7.03  | 3  | 12.57  | 11088454.49  | 2563706.66   | 2715971.99  | 0.23   | 0.24   | 0.09   | 0.05   |
| gi334184403 | aminopeptidase family protein                                      | 6.4   | 4  | 29.31  | 27805757.78  | 7236942.83   | n.e.v.      | 0.26   | n.e.v. | 0.39   | n.e.v. |
| gi334184408 | NADP-dependent glyceraldehyde-3-phosphate dehydrogenase            | 10.48 | 5  | 48.22  | 1734968.73   | 2607966.79   | 2170117.04  | 1.50   | 1.25   | 0.17   | 0.19   |
| gi334184571 | pentatricopeptide repeat-containing protein                        | 3.38  | 1  | 26.26  | 24933209.76  | 13990005.89  | 16739281.23 | 0.56   | 0.67   | 0.16   | 0.11   |
| gi334184593 | photosystem II subunit P-2                                         | 33.6  | 14 | 77.55  | 14611974.02  | 6965997.82   | 5649735.72  | 0.48   | 0.39   | 0.18   | 0.13   |
| gi334184607 | uncharacterized protein                                            | 3.99  | 2  | 15.53  | 14474445.93  | n.e.v.       | 17137938.78 | n.e.v. | 1.18   | n.e.v. | 0.84   |
| gi334184908 | O-acetylserine (thiol) lyase (OAS-TL) isoform oasB                 | 21.43 | 9  | 78.06  | 6364019.49   | 7227752.92   | 8443883.31  | 1.14   | 1.33   | 0.67   | 0.23   |
| gi334185190 | heat shock protein 70-3                                            | 35.9  | 29 | 189.8  | 17067382.92  | 12777332.84  | 17925823.49 | 0.75   | 1.05   | 0.05   | 0.76   |
| gi334185347 | peroxisomal (S)-2-hydroxy-acid oxidase GLO2                        | 29.97 | 23 | 179.83 | 13229672.94  | 9865556.29   | 13869670.66 | 0.75   | 1.05   | 0.04   | 0.61   |
| gi334185547 | O-acetylserine (thiol) lyase (OAS-TL) isoform A2                   | 3.93  | 1  | 21.18  | 2208781.82   | 1246339.21   | 1776383.88  | 0.56   | 0.80   | 0.41   | 0.76   |
| gi334185828 | Clp ATPase                                                         | 5.32  | 9  | 91.92  | 126955400.64 | 128213186.76 | n.e.v.      | 1.01   | n.e.v. | 0.99   | n.e.v. |
| gi334185964 | fructose-1,6-bisphosphatase                                        | 6.47  | 4  | 32.97  | 2023228.46   | 2085174.65   | 2705395.96  | 1.03   | 1.34   | 0.83   | 0.17   |
| gi334186158 | transketolase                                                      | 22.57 | 32 | 235.04 | 23897260.58  | 31624235.23  | 26323229.20 | 1.32   | 1.10   | 0.08   | 0.46   |
| gi334186198 | peptidyl-prolyl cis-trans isomerase CYP20-3                        | 43.24 | 18 | 147.74 | 27863172.09  | 20291120.37  | 19599566.23 | 0.73   | 0.70   | 0.05   | 0.11   |
| gi334187077 | aspartate aminotransferase                                         | 6.7   | 4  | 32.4   | 720180.30    | 2025346.38   | 1733031.58  | 2.81   | 2.41   | 0.12   | 0.22   |
| gi334187695 | voltage dependent anion channel 3                                  | 21.9  | 5  | 47.03  | 2553408.50   | 2436988.95   | 1573957.74  | 0.95   | 0.62   | 0.89   | 0.22   |

|             |                                              |       |     |        |              |              |              |        |        |        |        |
|-------------|----------------------------------------------|-------|-----|--------|--------------|--------------|--------------|--------|--------|--------|--------|
| gi334187803 | chaperonin 20                                | 39.53 | 16  | 129.12 | 8900141.76   | 3512930.87   | 7728304.94   | 0.39   | 0.87   | 0.12   | 0.70   |
| gi334188676 | aldose 1-epimerase family protein            | 4.23  | 1   | 18.37  | 10115184.15  | 7457953.52   | 11751904.00  | 0.74   | 1.16   | 0.46   | 0.69   |
| gi42565109  | cell wall-plasma membrane linker protein     | 5.99  | 6   | 32.21  | 767266.12    | 1410541.96   | 443436.03    | 1.84   | 0.58   | 0.11   | 0.35   |
| gi42570951  | 60S acidic ribosomal protein P2-2            | 46.09 | 3   | 28.87  | 4815558.97   | 4193326.20   | 2629681.31   | 0.87   | 0.55   | 0.82   | 0.41   |
| gi42571269  | protein disulfide-isomerase like 2-1         | 4.51  | 1   | 4.73   | 1039913.70   | 1123127.71   | 653382.41    | 1.08   | 0.63   | 0.88   | 0.38   |
| gi42571485  | FAD/NAD(P)-binding oxidoreductase            | 5.17  | 3   | 14.1   | 28955522.42  | 8866258.79   | n.e.v.       | 0.31   | n.e.v. | 0.38   | n.e.v. |
| gi42571761  | photosystem II subunit S                     | 8.78  | 1   | 4.97   | 9357610.35   | 12660103.66  | 10740853.83  | 1.35   | 1.15   | 0.76   | 0.76   |
| gi42572347  | adenosine kinase 1                           | 19.54 | 16  | 73.05  | 6747926.29   | 7974740.92   | 4280554.05   | 1.18   | 0.63   | 0.27   | 0.35   |
| gi42573658  | putative sorbitol dehydrogenase              | 7.14  | 4   | 38.58  | 1556410.50   | 682673.19    | 978704.99    | 0.44   | 0.63   | 0.12   | 0.33   |
| gi7525018   | ATP synthase CF1 alpha subunit               | 36.88 | 77  | 526.65 | 42923992.28  | 34451920.91  | 40515113.37  | 0.80   | 0.94   | 0.04   | 0.46   |
| gi7525019   | ATP synthase CF0 B subunit                   | 20.11 | 3   | 27.39  | 23301385.60  | 19283007.71  | n.e.v.       | 0.83   | n.e.v. | 0.82   | n.e.v. |
| gi7525028   | photosystem II protein D2                    | 6.23  | 2   | 12.59  | 2721427.96   | 2799609.70   | 2024427.17   | 1.03   | 0.74   | 0.86   | 0.11   |
| gi7525029   | photosystem II 44 kDa protein                | 6.98  | 4   | 24.11  | 6604190.43   | n.e.v.       | 4210966.52   | n.e.v. | 0.64   | n.e.v. | 0.53   |
| gi7525039   | ATP synthase CF1 epsilon subunit             | 62.12 | 13  | 72.94  | 9871235.23   | 9544440.80   | 8738035.01   | 0.97   | 0.89   | 0.88   | 0.33   |
| gi7525040   | ATP synthase CF1 beta subunit                | 73.29 | 154 | 923.04 | 152946303.89 | 165866097.13 | 158572240.14 | 1.08   | 1.04   | 0.40   | 0.45   |
| gi7525059   | photosystem II 47 kDa protein                | 9.84  | 14  | 67.57  | 14694874.78  | 23514245.33  | 2193213.98   | 1.60   | 0.15   | 0.54   | 0.36   |
| gi7525069   | ribosomal protein L14                        | 27.05 | 6   | 30.29  | 7234546.44   | 6422647.32   | 970013.24    | 0.89   | 0.13   | 0.91   | 0.14   |
| gi7525086   | photosystem I subunit VII                    | 35.8  | 6   | 37.09  | 8060231.75   | 4040176.11   | 9649869.41   | 0.50   | 1.20   | 0.19   | 0.57   |
| gi79313237  | protein DJ-1-like A                          | 10.84 | 5   | 44.69  | 5585106.28   | 5079143.43   | 2134560.51   | 0.91   | 0.38   | 0.77   | 0.07   |
| gi79313261  | PYK10-binding protein 1                      | 40.6  | 22  | 116.98 | 14591927.22  | 20637703.83  | 8384935.03   | 1.41   | 0.57   | 0.26   | 0.12   |
| gi79313265  | JA-responsive protein 1                      | 6.65  | 3   | 21.62  | 599592.69    | 670234.34    | 430925.72    | 1.12   | 0.72   | 0.81   | 0.48   |
| gi79313434  | gamma-hydroxybutyrate dehydrogenase          | 22.66 | 7   | 51.13  | 1128450.17   | 697459.97    | 928881.84    | 0.62   | 0.82   | 0.31   | 0.70   |
| gi79314469  | UDP-XYL synthase 5                           | 4.11  | 2   | 23.01  | 2438322.22   | 3522720.91   | n.e.v.       | 1.44   | n.e.v. | 0.44   | n.e.v. |
| gi79314743  | 20S proteasome alpha subunit PAD1            | 5.76  | 1   | 8.96   | 666073.32    | 1022697.08   | n.e.v.       | 1.54   | n.e.v. | 0.12   | n.e.v. |
| gi79314806  | ATP synthase subunit d                       | 9.84  | 1   | 4.64   | 498240.74    | 1238428.06   | n.e.v.       | 2.49   | n.e.v. | 0.18   | n.e.v. |
| gi79316582  | 40S ribosomal protein S15-1                  | 23.84 | 2   | 11.95  | 1619012.98   | 2400538.69   | n.e.v.       | 1.48   | n.e.v. | 0.10   | n.e.v. |
| gi79318406  | glutamate:glyoxylate aminotransferase        | 30.16 | 22  | 139.49 | 32528026.49  | 29763682.00  | 6502816.33   | 0.92   | 0.20   | 0.83   | 0.10   |
| gi79320443  | PSI type III chlorophyll a/b-binding protein | 30.28 | 12  | 63.1   | 7717406.00   | 9924177.78   | 10955181.72  | 1.29   | 1.42   | 0.03   | 0.35   |
| gi79321061  | glutamate--glyoxylate aminotransferase 2     | 21.62 | 17  | 98.13  | 11124045.31  | 10861661.13  | 14590417.20  | 0.98   | 1.31   | 0.72   | 0.20   |
| gi79321468  | V-type proton ATPase catalytic subunit A     | 6.74  | 6   | 28.17  | 2160932.37   | 3516398.50   | 3924180.77   | 1.63   | 1.82   | 0.14   | 0.12   |
| gi79322198  | 20S proteasome subunit PAA2                  | 12.27 | 3   | 22.07  | 207854.18    | 228354.99    | n.e.v.       | 1.10   | n.e.v. | 0.27   | n.e.v. |
| gi79322611  | ubiquitin fusion degradation 1               | 6.58  | 2   | 9.52   | 42276.21     | 39782.03     | n.e.v.       | 0.94   | n.e.v. | 0.92   | n.e.v. |
| gi79322643  | fructose-bisphosphate aldolase 1             | 17.36 | 10  | 104.58 | 37320828.38  | 11302287.13  | 24453894.04  | 0.30   | 0.66   | 0.20   | 0.62   |



|            |                                                     |       |    |        |             |             |            |      |        |      |        |
|------------|-----------------------------------------------------|-------|----|--------|-------------|-------------|------------|------|--------|------|--------|
| gi79324564 | 40S ribosomal protein S5-1                          | 7.25  | 2  | 17.92  | 1352996.68  | 348663.03   | 825021.06  | 0.26 | 0.61   | 0.25 | 0.53   |
| gi79324933 | photosystem I P subunit                             | 12.64 | 3  | 23.86  | 846968.07   | 788511.12   | 1139795.52 | 0.93 | 1.35   | 0.87 | 0.48   |
| gi79325183 | plasma-membrane associated cation-binding protein 1 | 10.22 | 7  | 41.88  | 5024048.44  | 247643.11   | n.e.v.     | 0.05 | n.e.v. | 0.14 | n.e.v. |
| gi79325203 | pyruvate, phosphate dikinase regulatory protein 1   | 7.18  | 1  | 9.24   | 313770.49   | 183802.97   | n.e.v.     | 0.59 | n.e.v. | 0.06 | n.e.v. |
| gi79325233 | glutamate-cysteine ligase                           | 5.45  | 1  | 18.07  | 1746255.17  | 826218.90   | n.e.v.     | 0.47 | n.e.v. | 0.30 | n.e.v. |
| gi79325249 | superoxide dismutase [Fe]                           | 8.06  | 4  | 19.49  | 2486888.00  | 2937163.56  | 1578800.93 | 1.18 | 0.63   | 0.45 | 0.12   |
| gi79326317 | catalase 2                                          | 17.51 | 10 | 112.76 | 25330808.98 | 28163733.13 | 8517247.53 | 1.11 | 0.34   | 0.76 | 0.10   |
| gi79327622 | 14-3-3-like protein GF14 lambda                     | 11.79 | 5  | 38.95  | 813184.17   | 679163.40   | 770663.13  | 0.84 | 0.95   | 0.66 | 0.89   |
| gi79327847 | isopropylmalate dehydrogenase 1                     | 3.87  | 4  | 22.15  | 2105395.21  | 1305985.46  | 1133527.76 | 0.62 | 0.54   | 0.31 | 0.34   |
| gi79329027 | biotin carboxylase subunit CAC2                     | 10.02 | 3  | 36.15  | 673336.01   | 401108.57   | n.e.v.     | 0.60 | n.e.v. | 0.35 | n.e.v. |
| gi79329220 | 14-3-3-like protein GF14 psi                        | 11.42 | 1  | 42.94  | 1856013.90  | 3176106.41  | 2921328.60 | 1.71 | 1.57   | 0.06 | 0.31   |
| gi79329956 | beta-ketoacyl-[acyl carrier protein] synthase I     | 9.09  | 6  | 39.81  | 4095417.81  | 2349312.57  | 3675944.65 | 0.57 | 0.90   | 0.15 | 0.75   |

**Table S4.** List of gene ontology annotations connected to development found in differential proteome of roots of *fra2* mutant.

| Level | GO         | Term(Acc) | Term(Name)                                  | #Seq | Score |
|-------|------------|-----------|---------------------------------------------|------|-------|
| 6     | GO:0009555 |           | pollen development                          | 4    | 3.36  |
| 6     | GO:0048580 |           | regulation of post-embryonic development    | 4    | 1.44  |
| 6     | GO:0022622 |           | root system development                     | 4    | 0.73  |
| 6     | GO:0048513 |           | organ development                           | 4    | 0.67  |
| 6     | GO:0009664 |           | plant-type cell wall organization           | 3    | 3.20  |
| 6     | GO:0009720 |           | detection of hormone stimulus               | 2    | 1.20  |
| 6     | GO:0048468 |           | cell development                            | 2    | 0.26  |
| 6     | GO:0009553 |           | embryo sac development                      | 1    | 0.60  |
| 6     | GO:0048640 |           | negative regulation of developmental growth | 1    | 0.60  |
| 6     | GO:0000902 |           | cell morphogenesis                          | 1    | 0.36  |
| 6     | GO:0061458 |           | reproductive system development             | 1    | 0.13  |

**Table S5.** List of gene ontology annotations connected to development found in differential proteome of roots of *ktn1-2* mutant.

| Level | GO         | Term(Acc) | Term(Name)                               | #Seq | Score |
|-------|------------|-----------|------------------------------------------|------|-------|
| 6     | GO:0048513 |           | organ development                        | 5    | 1.37  |
| 6     | GO:0061458 |           | reproductive system development          | 4    | 1.40  |
| 6     | GO:0048367 |           | shoot system development                 | 3    | 1.36  |
| 6     | GO:0000902 |           | cell morphogenesis                       | 2    | 0.96  |
| 6     | GO:0048468 |           | cell development                         | 2    | 0.96  |
| 6     | GO:0022622 |           | root system development                  | 2    | 0.44  |
| 6     | GO:0009553 |           | embryo sac development                   | 1    | 1.00  |
| 6     | GO:0009555 |           | pollen development                       | 1    | 1.00  |
| 6     | GO:0009846 |           | pollen germination                       | 1    | 1.00  |
| 6     | GO:0048868 |           | pollen tube development                  | 1    | 0.60  |
| 6     | GO:0090351 |           | seedling development                     | 1    | 0.60  |
| 6     | GO:0048580 |           | regulation of post-embryonic development | 1    | 0.36  |

**Table S6.** List of gene ontology annotations connected to development found in differential proteome of above ground part of *fra2* mutant.

| LevelGO | Term(Acc)  | Term(Name)                      | #Seq | Score |
|---------|------------|---------------------------------|------|-------|
| 6       | GO:0048513 | organ development               | 11   | 2.92  |
| 6       | GO:0048367 | shoot system development        | 9    | 3.37  |
| 6       | GO:0009886 | post-embryonic morphogenesis    | 5    | 3.00  |
| 6       | GO:0022622 | root system development         | 3    | 0.76  |
| 6       | GO:0061458 | reproductive system development | 2    | 0.43  |
| 6       | GO:0048468 | cell development                | 2    | 0.26  |
| 6       | GO:0090351 | seedling development            | 1    | 0.60  |
| 6       | GO:0000902 | cell morphogenesis              | 1    | 0.36  |

**Table S7.** List of gene ontology annotations connected to development found in differential proteome of above ground part of *ktn1*- mutant.

| LevelGO | Term(Acc)  | Term(Name)                      | #Seq | Score |
|---------|------------|---------------------------------|------|-------|
| 6       | GO:0048513 | organ development               | 9    | 2.35  |
| 6       | GO:0048367 | shoot system development        | 7    | 2.29  |
| 6       | GO:0061458 | reproductive system development | 4    | 1.01  |
| 6       | GO:0009886 | post-embryonic morphogenesis    | 3    | 1.80  |
| 6       | GO:0022622 | root system development         | 2    | 0.68  |
| 6       | GO:0000902 | cell morphogenesis              | 1    | 0.36  |
| 6       | GO:0048468 | cell development                | 1    | 0.13  |

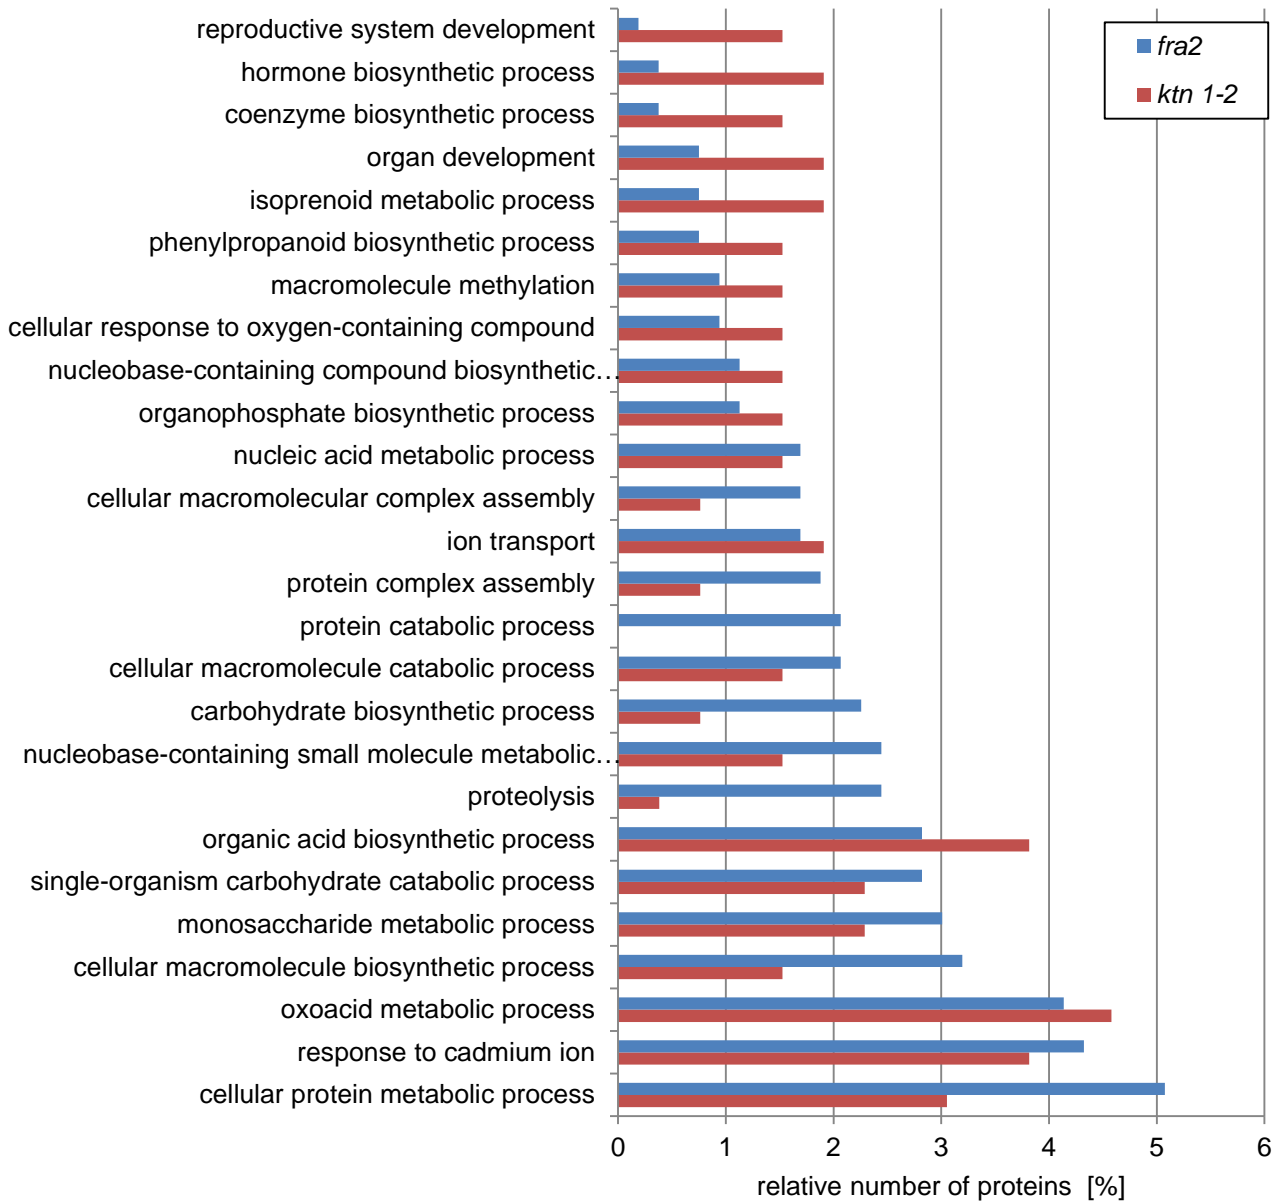

**Figure S1** Comparison of gene ontology annotations (at 6th level of ontology) of differentially abundant proteins in *fra2* and *ktn1-2* mutant roots (as compared to Col-0) according to biological process. Relative numbers of proteins per annotation are presented in the graph.

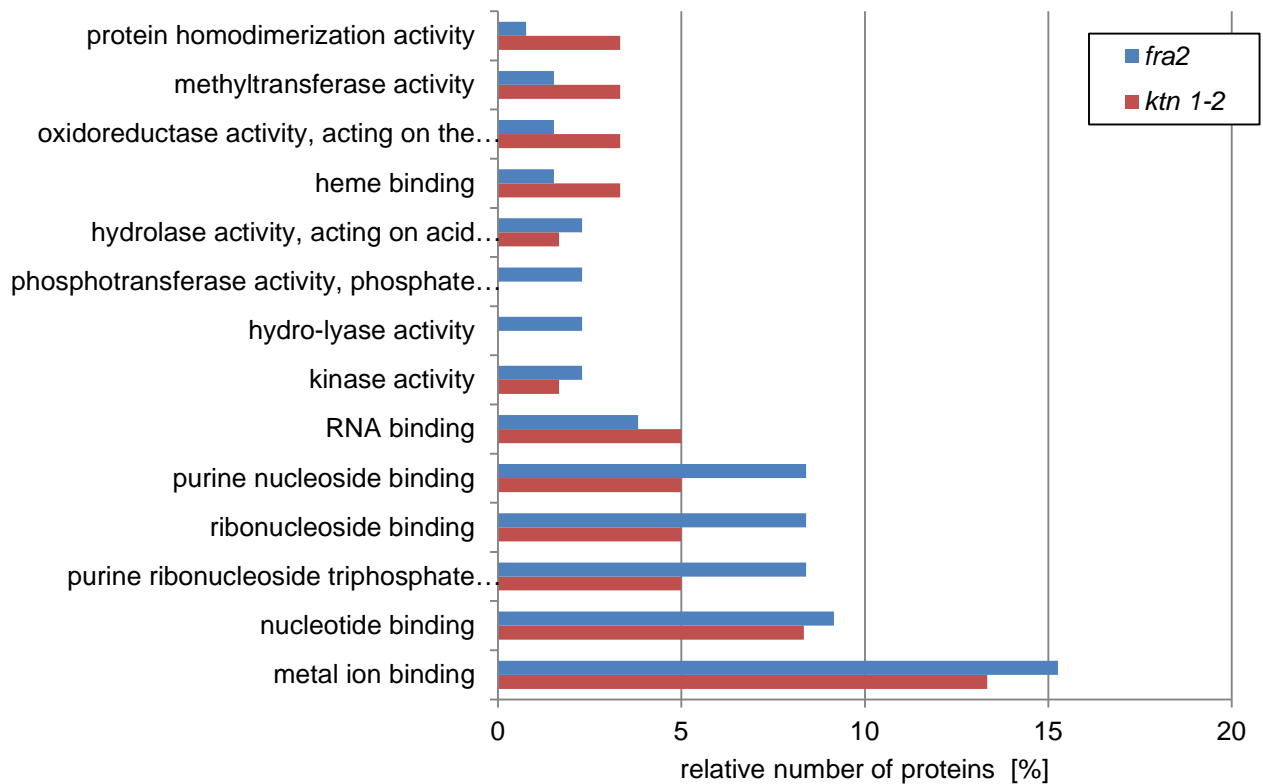

**Figure S2** Comparison of gene ontology annotations (at 5th level of ontology) of differentially abundant proteins in *fra2* and *ktn1-2* mutant roots (as compared to Col-0) according to molecular function. Relative numbers of proteins per annotation are presented in the graph.

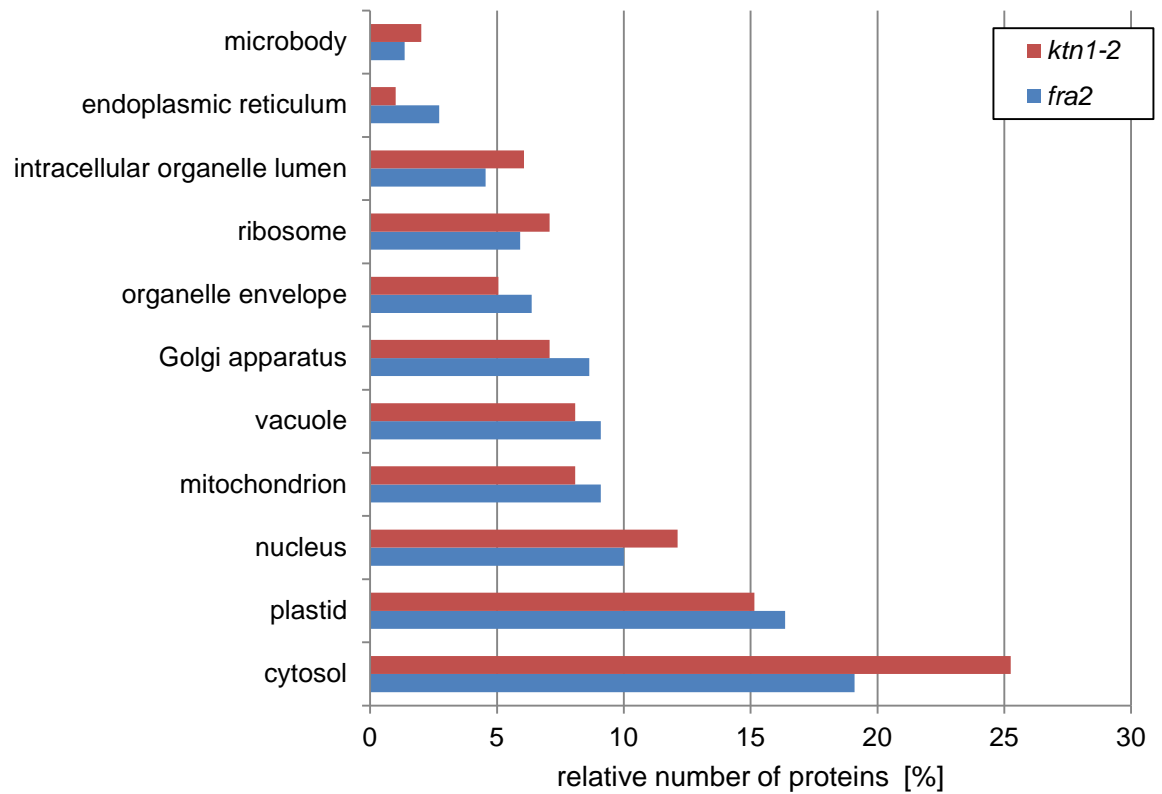

**Figure S3** Comparison of gene ontology annotations (at 8th level of ontology) of differentially abundant proteins in *fra2* and *ktn1-2* mutant roots (as compared to Col-0) according to localization. Relative numbers of proteins per annotation are presented in the graph.

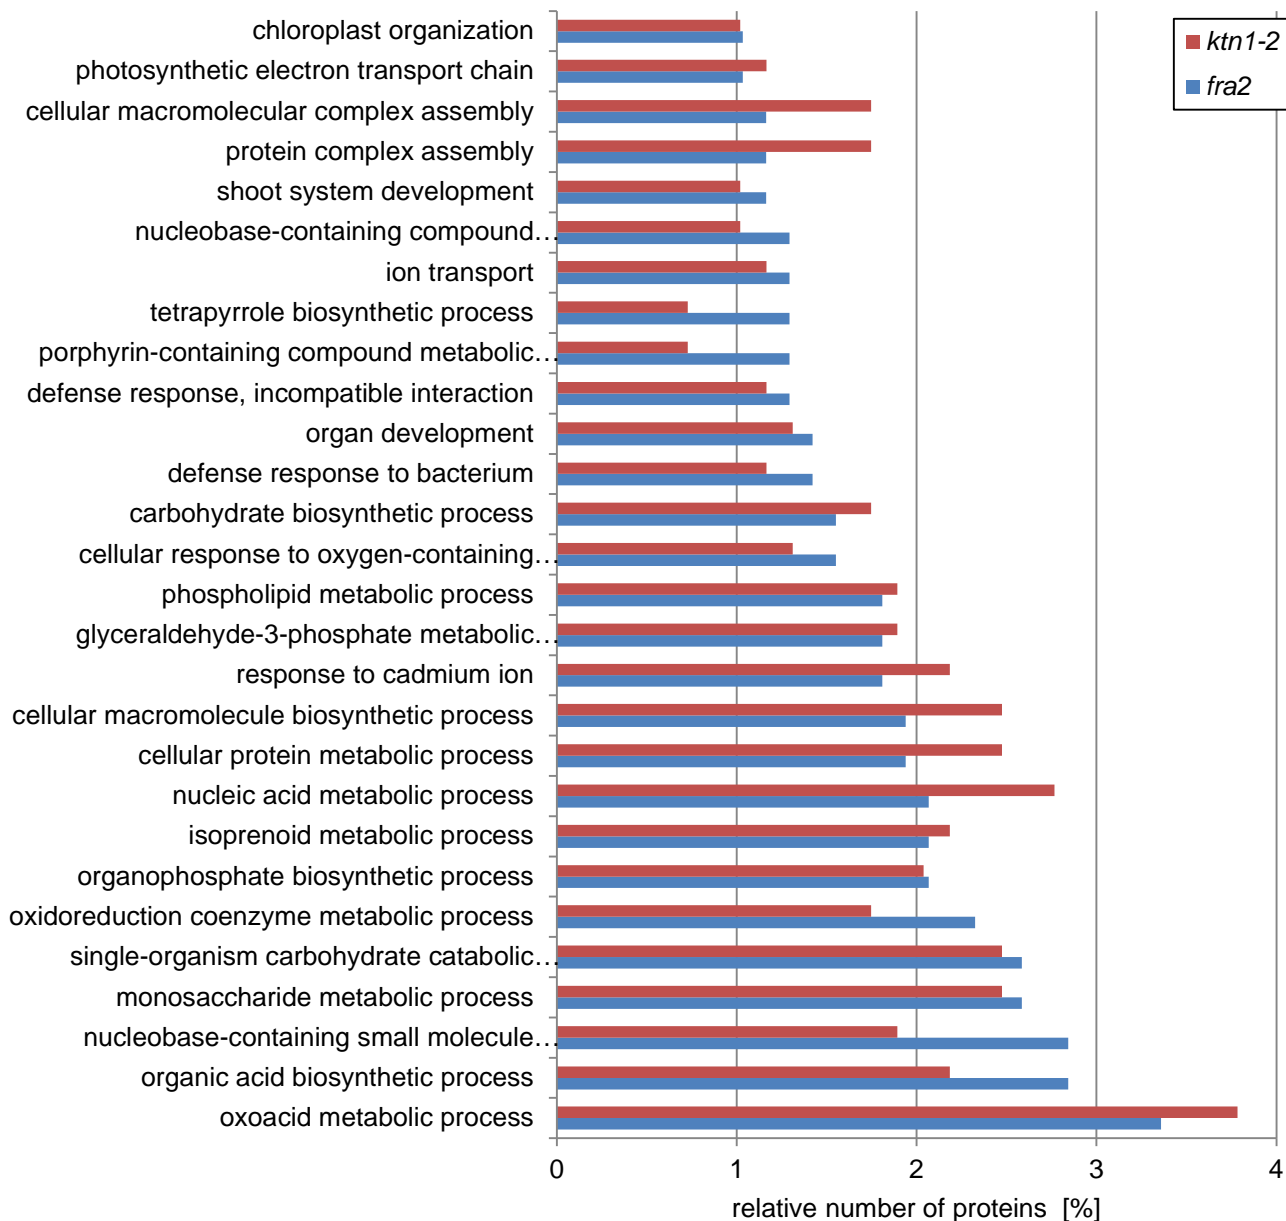

**Figure S4** Comparison of gene ontology annotations (at 6th level of ontology) of differentially abundant proteins in *fra2* and *ktn1-2* mutant above ground parts (as compared to Col-0) according to biological process. Relative numbers of proteins per annotation are presented in the graph.

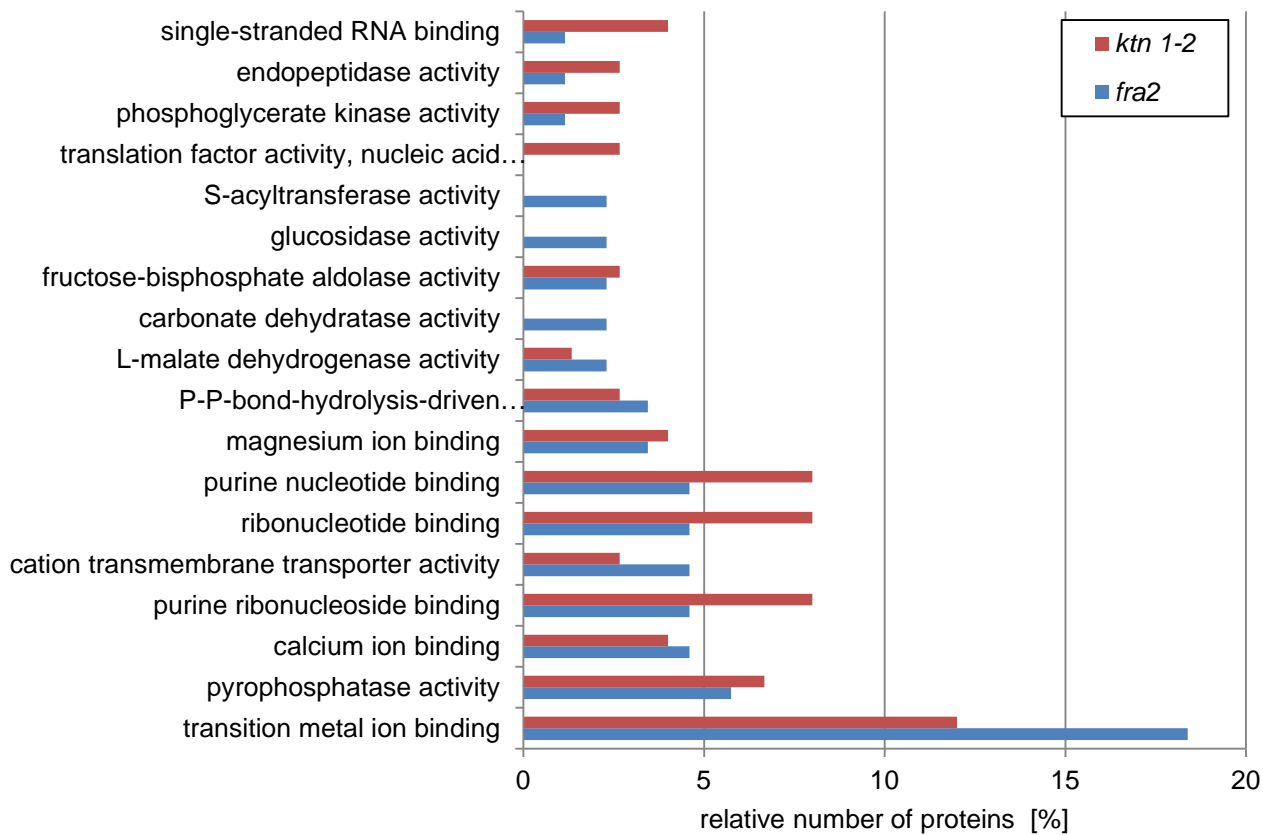

**Figure S5** Comparison of gene ontology annotations (at 5th level of ontology) of differentially abundant proteins in *fra2* and *ktn1-2* mutant above ground parts (as compared to Col-0) according to molecular function. Relative numbers of proteins per annotation are presented in the graph.



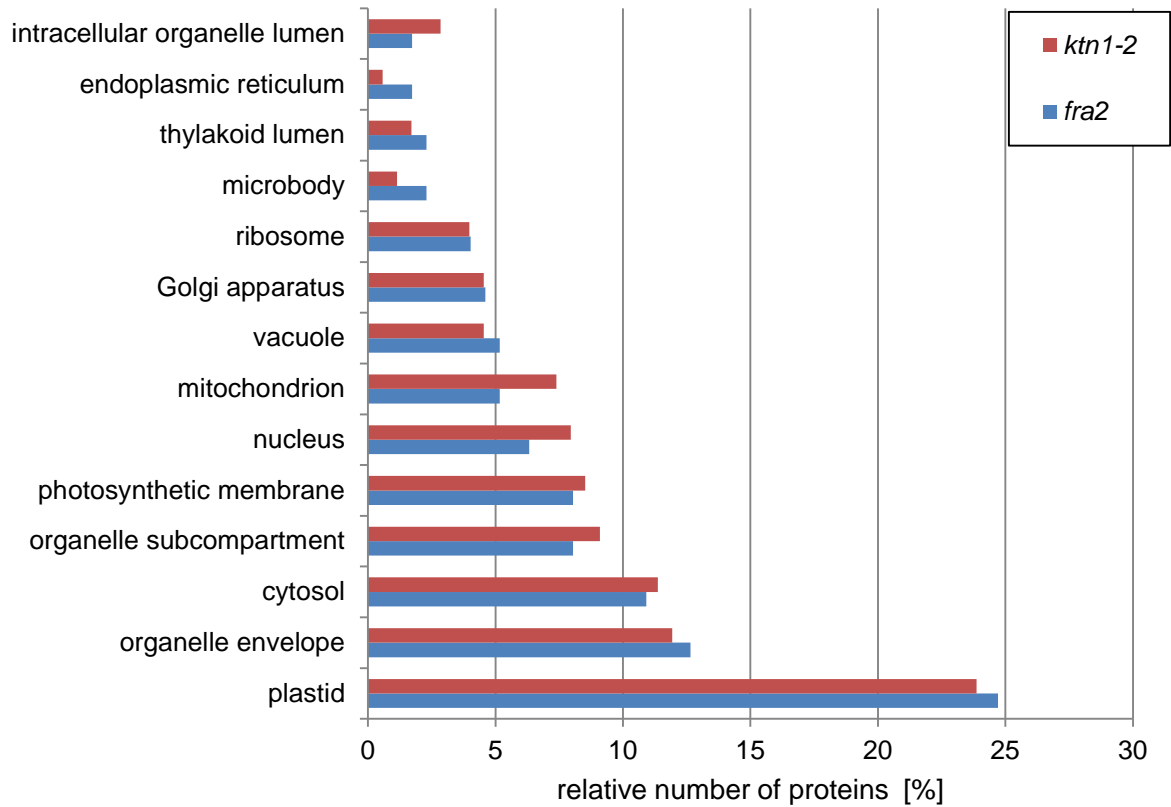

**Figure S6** Comparison of gene ontology annotations (at 5th level of ontology) of differentially abundant proteins in *fra2* and *ktn1-2* mutant above ground parts (as compared to Col-0) according to localisation. Relative numbers of proteins per annotation are presented in the graph.

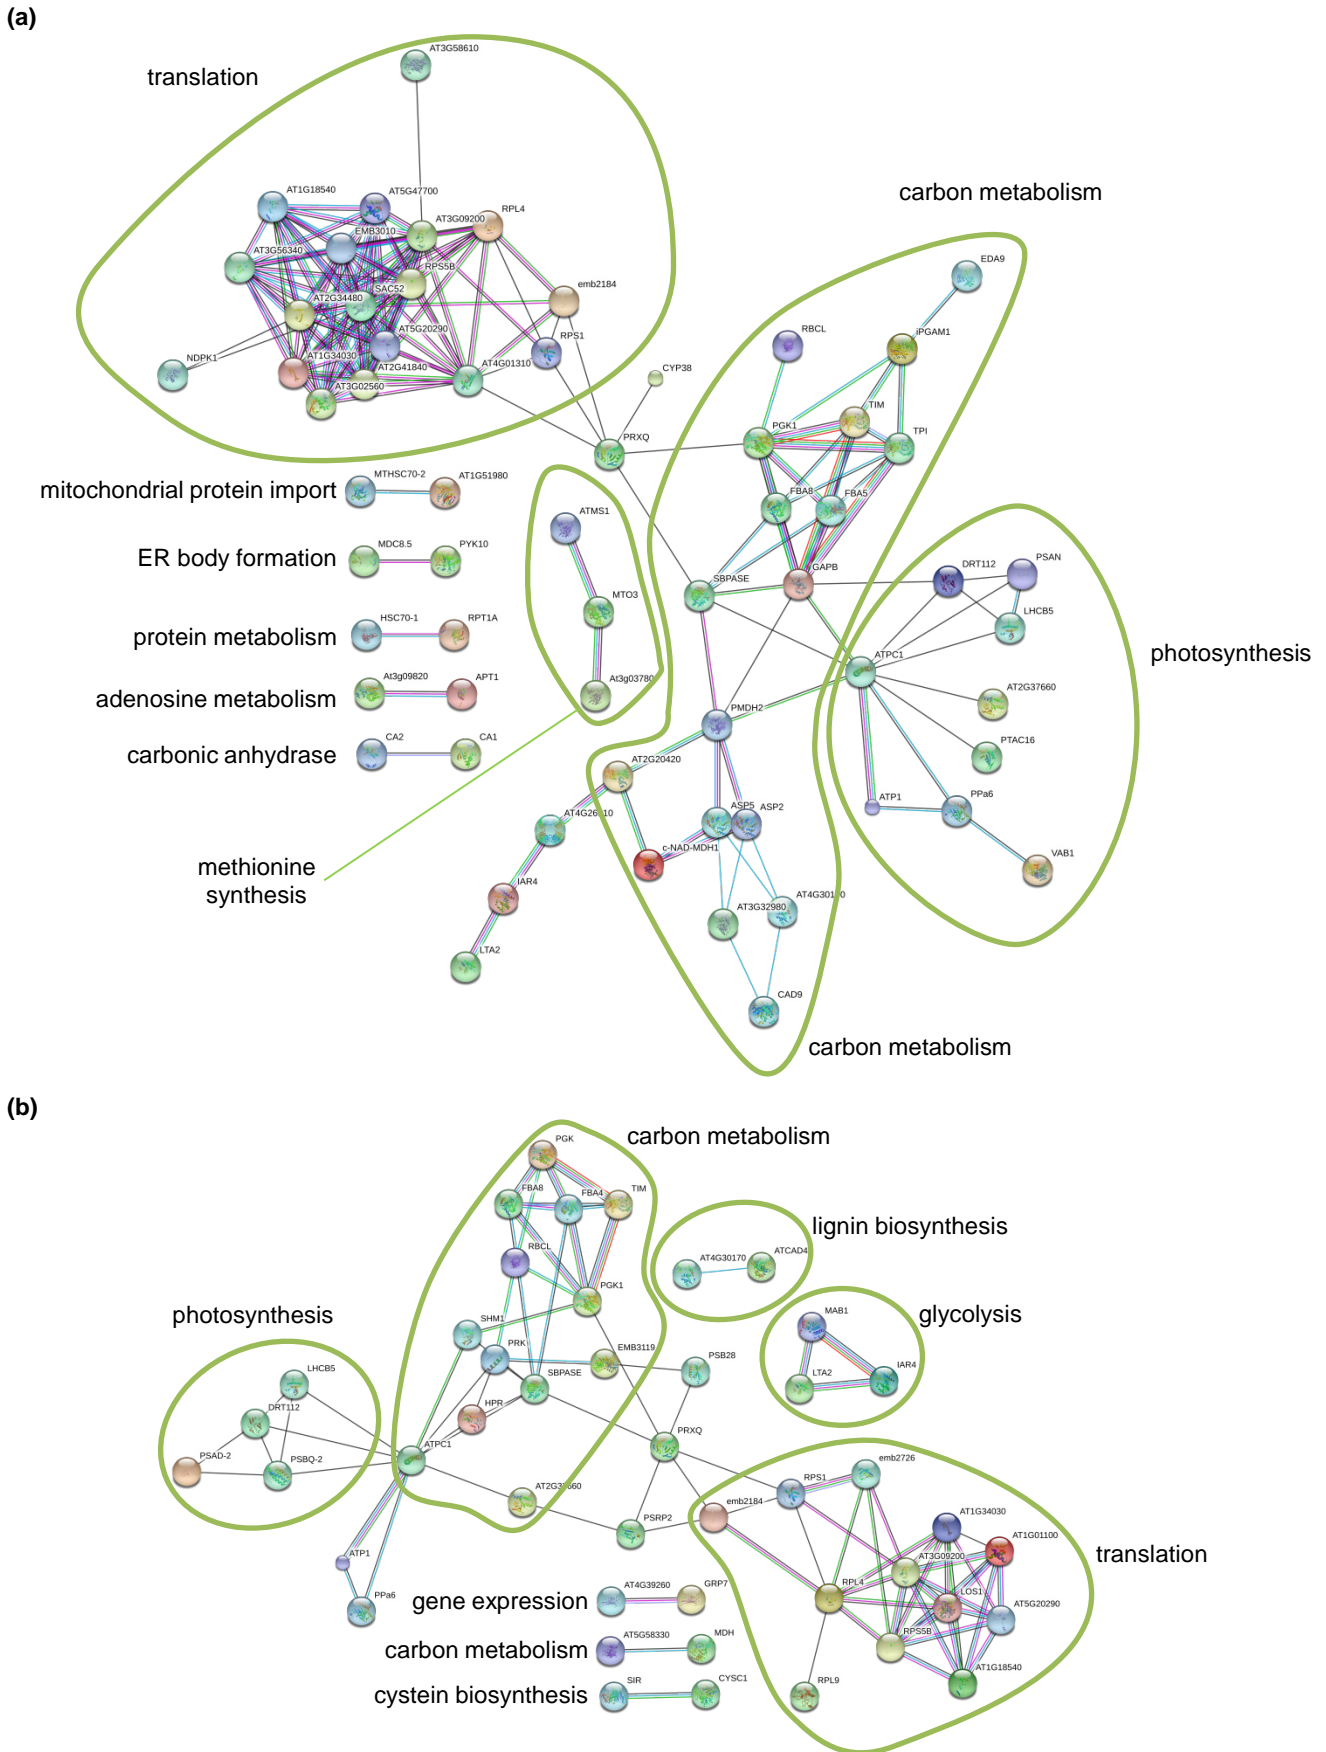

**Figure S7** Prediction of protein interaction networks in differential proteome of *fra2* (a) and *ktn1-2* (b) roots and aerial parts as predicted by STRING web-based application.

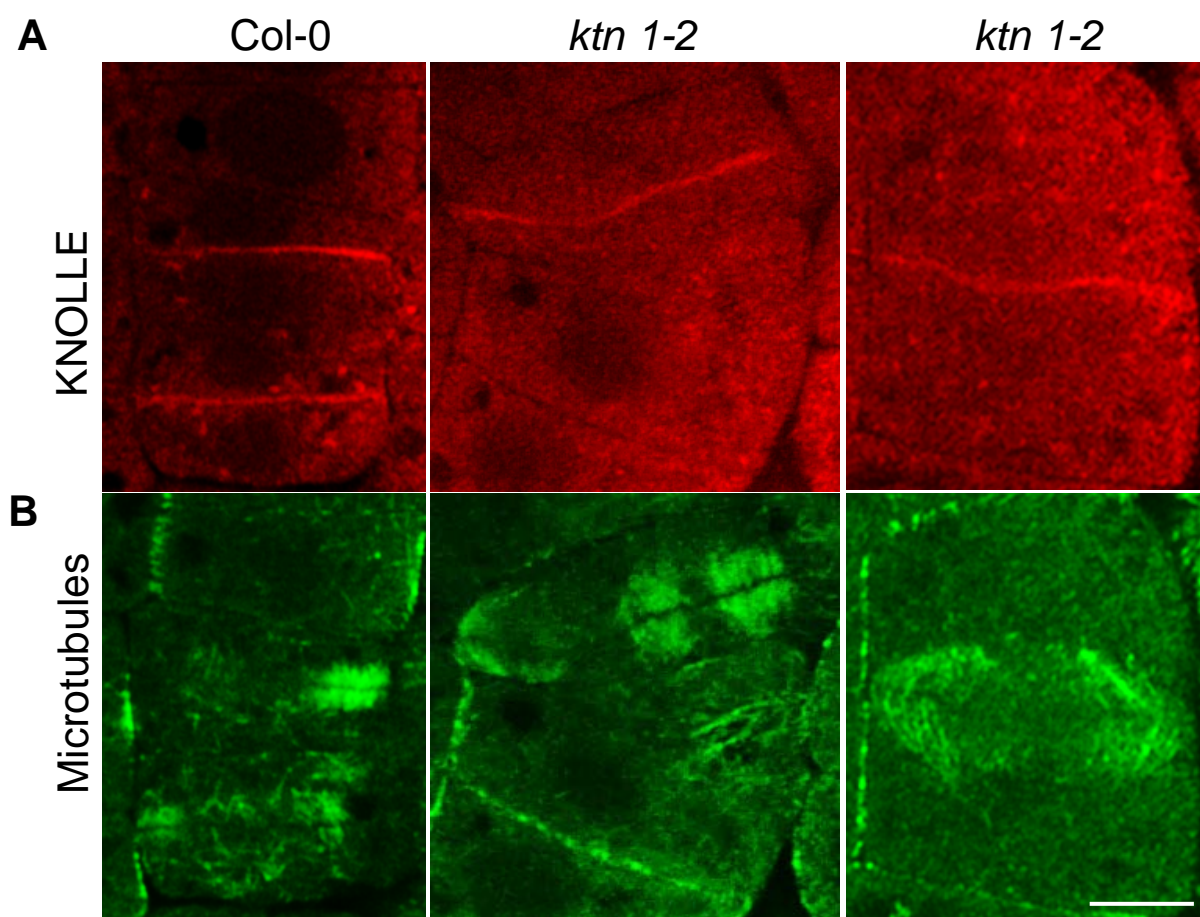

**Figure S8** Co-immunolocalization of cell plate marker KNOLLE (A) with phragmoplast microtubules (B) during late cytokinesis in root epidermal cells of Col-0 and *ktn1-2* mutant. Note asymmetric and aberrant cell plate deposition and bending in *ktn1-2* mutant. Bar represents 5  $\mu$ m.

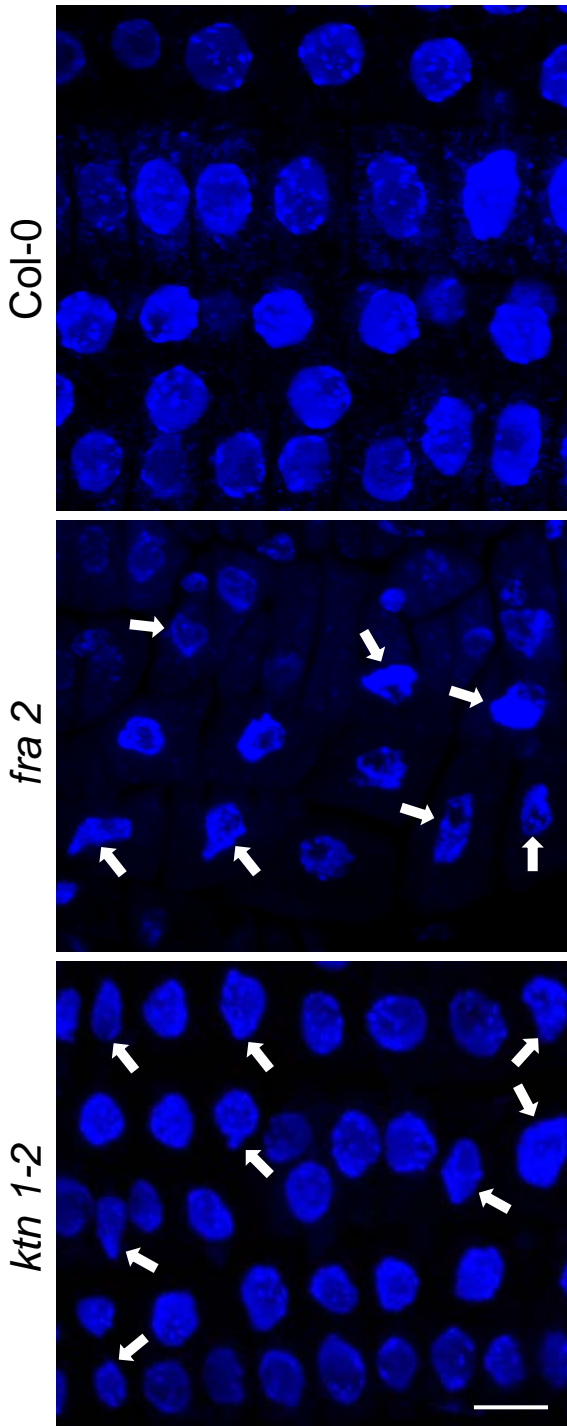

**Figure S9** Changes in nuclear shape (arrows) as revealed by DAPI staining of Col-0 and *KATANIN 1* mutants *fra 2* and *ktn1-2*. Bar represents 10  $\mu$ m.
